1 CRISPR screen reveals that EHEC's T3SS and Shiga toxin  
2 rely on shared host factors for infection

3  
4 Alline R. Pacheco<sup>1,2</sup>, Jacob E. Lazarus<sup>1,2,3</sup>, Brandon Sit<sup>1,2</sup>, Stefanie Schmieder<sup>4,5,6</sup>,  
5 Wayne I. Lencer<sup>4,5,6</sup>, Carlos J. Blondel<sup>7</sup>, John G. Doench<sup>8</sup>, Brigid M. Davis<sup>1,2</sup>,  
6 Matthew K. Waldor<sup>1,2,8,9\*</sup>

7  
8 <sup>1</sup>Division of Infectious Diseases, Brigham and Women's Hospital. Boston, MA, USA

9 <sup>2</sup>Department of Microbiology and Immunobiology, Harvard Medical School. Boston, MA,  
10 USA

11 <sup>3</sup>Division of Infectious Diseases, Massachusetts General Hospital. Boston, MA, USA

12 <sup>4</sup>Division of Gastroenterology, Boston Children's Hospital. Boston, MA, USA

13 <sup>5</sup>Department of Pediatrics, Harvard Medical School. Boston, MA, USA

14 <sup>6</sup>Department of Pediatrics, Harvard Digestive Diseases Center. Boston, MA, USA

15 <sup>7</sup>Institute of Biomedical Sciences, Universidad Autónoma de Chile. Santiago, Chile

16 <sup>8</sup>Broad Institute of MIT and Harvard. Cambridge, MA, USA

17 <sup>9</sup>Howard Hughes Medical Institute, Boston, MA, USA

18  
19 \*To whom correspondence should be addressed.

20  
21 E-mail: mwaldor@research.bwh.harvard.edu

22 Key words: CRISPR screen, host susceptibility, T3SS, Shiga toxin, EHEC, EPEC,  
23 sphingolipid synthesis, TM9SF2, LAPTM4A

## 24 **Abstract**

25 Enterohemorrhagic *Escherichia coli* (EHEC) has two critical virulence factors – a type III  
26 secretion system (T3SS) and Shiga toxins (Stx) – that are required for the pathogen to  
27 colonize the intestine and cause diarrheal disease. Here, we carried out a genome-wide  
28 CRISPR/Cas9 loss-of-function screen to identify host loci that facilitate EHEC infection  
29 of intestinal epithelial cells. Many of the guide RNAs identified targeted loci known to be  
30 associated with sphingolipid biosynthesis, particularly for production of  
31 globotriaosylceramide (Gb3), the Stx receptor. Two loci (TM9SF2 and LAPTM4A) with  
32 largely unknown functions were also targeted. Mutations in these loci not only rescued  
33 cells from Stx-mediated cell death, but also prevented cytotoxicity associated with the  
34 EHEC T3SS. These mutations interfered with early events associated with T3SS and  
35 Stx pathogenicity, markedly reducing entry of T3SS effectors into host cells and binding  
36 of Stx. The convergence of Stx and T3SS onto overlapping host targets provides  
37 guidance for design of new host-directed therapeutic agents to counter EHEC infection.

38

## 39 **Importance**

40 Enterohemorrhagic *Escherichia coli* (EHEC) has two critical virulence factors – a type III  
41 secretion system (T3SS) and Shiga toxins (Stx) – that are required for colonizing the  
42 intestine and causing diarrheal disease. We screened a genome-wide collection of  
43 CRISPR mutants derived from intestinal epithelial cells and identified mutants with  
44 enhanced survival following EHEC infection. Many had mutations that disrupted  
45 synthesis of a subset of lipids (sphingolipids) that includes the Stx receptor  
46 globotriaosylceramide (Gb3), and hence protect against Stx intoxication. Unexpectedly,

47 we found that sphingolipids also mediate early events associated with T3SS  
48 pathogenicity. Since antibiotics are contraindicated for the treatment of EHEC,  
49 therapeutics targeting sphingolipid biosynthesis are a promising alternative, as they  
50 could provide protection against both of the pathogen's key virulence factors.

51

## 52 **Introduction**

53 Enterohemorrhagic *E. coli* (EHEC) is a food-borne human pathogen that causes  
54 diarrheal illness worldwide. Infection is often associated with bloody diarrhea that is  
55 usually self-limited; however, 5-7% of cases progress to hemolytic uremic syndrome  
56 (HUS), a life-threatening complication that can result in renal failure and neurological  
57 sequelae (1). EHEC pathogenesis shares many features with that of enteropathogenic  
58 *E. coli* (EPEC), another extracellular pathogen that colonizes the intestine. Successful  
59 colonization by both species is dependent upon a type III secretion system (T3SS) that  
60 enables tight adherence of bacteria to host epithelial cells by inducing characteristic  
61 actin cytoskeletal rearrangements and loss of microvillus structure (attaching and  
62 effacing (AE) lesions) (2). EHEC virulence is also markedly shaped by production of  
63 Shiga toxins (Stx), variants of which are often present in multiple copies within the  
64 EHEC genome. Translocation of Stx to tissues outside of the intestinal tract is thought  
65 to underlie the development of HUS (3, 4).

66

67 The EHEC T3SS injects a plethora of effector proteins into host cells, resulting in  
68 alteration or disruption of numerous host cell processes. During infection, EHEC is  
69 thought to target epithelial cells within the large intestine; however, a variety of cultured

70 cell lines have been used to characterize the activity of this system. In vivo and in vitro  
71 studies have revealed that a key effector is the Translocated Intimin Receptor (Tir) (5).  
72 Tir is inserted into the host cell membrane and serves as a receptor for the bacterial  
73 adhesin, intimin (6). Interactions between intimin and Tir are also required for  
74 recruitment and rearrangement of actin and other cytoskeletal proteins underneath  
75 adherent bacteria, which results in characteristic actin-rich “pedestals.” In animal  
76 models, deletions of *tir* or *eae* (the intimin locus) and mutations that render the T3SS  
77 inactive markedly reduce the pathogen’s capacity to colonize the intestine and cause  
78 disease (7, 8).

79

80 Thirty eight bacterial proteins in addition to Tir have been confirmed as type 3 secreted  
81 effector proteins in EHEC (9). Unlike structural components of the T3SS, individual  
82 effector proteins are frequently not essential for bacterial virulence; although their roles  
83 have not been fully defined, it is clear that effector proteins can act in redundant,  
84 synergistic and antagonistic fashions (10). Key host processes modulated by EHEC  
85 effectors include innate immunity, cytoskeletal dynamics, host cell signaling, and  
86 apoptosis (11). EHEC effectors also restrict host cell phagocytosis of this extracellular  
87 pathogen. Effectors undergo an ordered translocation and after its translocation, the  
88 effector protein EspZ functions as a “translocation stop” that prevents unlimited effector  
89 translocation and reduces infection-associated cytotoxicity (12). Compared to wt  
90 infection, in vitro infection with *espZ*-deficient strains results in greater host cell  
91 detachment, loss of membrane potential, and formation of condensed nuclei (13).

92

93 Although Stx are pivotal to EHEC pathogenesis, the effects of these AB<sub>5</sub> toxins on the  
94 intestinal epithelium per se are not entirely clear. Toxicity was initially thought to be  
95 largely restricted to tissues beyond the intestinal tract (e.g., microvascular endothelial  
96 cells within the kidneys and the brain in the setting of HUS) (14); however, more recent  
97 in vivo and ex vivo studies suggest that Stx intoxication may also occur in the intestine  
98 at the primary site of infection. Although at low levels, receptors for Stx are present  
99 within human colonic epithelial cells (15), and Stx2 causes extensive cell death to the  
100 intestinal mucosa (16, 17). Furthermore, oral administration of Stx can lead to diarrhea  
101 in animals, and in several animal models of EHEC intestinal disease, severe diarrhea is  
102 dependent on Stx (8, 17).

103

104 The principal receptor for most forms of Stx (including Stx1 and Stx2, which are  
105 produced by the EHEC strain used in this study) is a neutral glycosphingolipid,  
106 globotriaosylceramide (Gb3). Following binding of Stx to Gb3, the toxin is internalized  
107 and undergoes retrograde transport through early endosomes, the Golgi, and the ER;  
108 the A subunit is cleaved by furin in the Golgi, followed by disulfide bond reduction in the  
109 ER that releases the catalytic active A1 fragment, which undergoes retro-translocation  
110 into the cytosol (18). Site specific depurination of 28S rRNA by the toxin results in  
111 inhibition of protein synthesis and can induce the ribotoxic stress response, the unfolded  
112 protein response, and apoptosis (19–22).

113

114 Analyses of EHEC pathogenesis have primarily focused upon identification and  
115 characterization of bacterial factors rather than on host factors required for

116 pathogenicity. Though some host factors, particularly those required for the actions of  
117 Stx and of the T3SS effectors, have been identified, to date, unbiased genome-wide  
118 screens for EHEC susceptibility loci have not been reported. Recently, such screens  
119 have become possible, given the advent of CRISPR/Cas9-based libraries of host  
120 mutants whose composition can be monitored using high throughput DNA sequencing.  
121 We recently used this approach to screen for host factors that mediate susceptibility to  
122 *V. parahaemolyticus*' two T3SS, and identified several host processes not previously  
123 linked to T3SS activity (23). The efficiency and power of this approach (24, 25),  
124 prompted us to adopt this approach to identify mutants with heightened resistance to  
125 EHEC.

126  
127 Here, we identify and characterize intestinal epithelial cell mutants that become  
128 enriched following library infection with an EHEC strain producing an active T3SS as  
129 well as Stx. Although minimal overlap between the action of the T3SS and Stx have  
130 previously been reported, we identified several host loci and processes that are required  
131 for the effects of both virulence factors. Genes required for production of the Stx  
132 receptor Gb3 and other sphingolipids were also found to be necessary for translocation  
133 of T3SS effectors into host cells. Additionally, we identified 2 minimally characterized  
134 loci not previously linked to either T3SS or Stx response pathways and find that they are  
135 critical for the biogenesis of host cell Gb3 and hence susceptibility to EHEC infection.

136

## 137 **Results**

### 138 **CRISPR/Cas9 screen for host factors conferring susceptibility to EHEC infection**

139 We developed a genome-wide CRISPR/Cas9 screen to identify host factors that  
140 contribute to susceptibility to EHEC infection in the HT-29 colonic epithelial cell line  
141 using the Avana library of sgRNAs (23). This library contains four sgRNAs targeting  
142 each of the annotated human protein coding genes (26). Host cells were infected with a  
143  $\Delta espZ$  derivative of EHEC strain EDL933 (which carries genes encoding both Stx1 and  
144 Stx2). The  $\Delta espZ$  mutation heightens T3SS activity and increases host cell death  
145 associated with infection by EHEC (13) (Fig. S1A). We anticipated that if we could  
146 increase the toxicity of the EHEC T3SS (Fig. S1B), we would enhance the screen's  
147 selective pressure and yield greater enrichment of host cell mutants resistant to this key  
148 virulence system. Although Stx1 and Stx2 were also produced under infection  
149 conditions (Fig. S1C), initial toxicity assays using purified toxin suggested that they  
150 would not exert substantial selective pressure during the screen. In contrast to infection  
151 of cells with  $\Delta espZ$  EHEC, which resulted in marked (~80%) host cell death by the end  
152 of the infection period (Fig. 1AB), a corresponding 6-hour treatment of cells with purified  
153 toxin exceeding the amount detected during infection had minimal effect on viability  
154 (Fig. S1D).

155

156 For the screen, two biological replicates of libraries of HT-29 cells mutagenized with the  
157 Avana guide RNAs were infected for 6 hr with  $\Delta espZ$  EHEC at an MOI of 100 (Fig. 1A).  
158 Following infection, resistant cells were cultured in the presence of antibiotics until  
159 reaching ~70% confluency (~5 days), then reseeded and reinfected. Genomic DNA was  
160 isolated from a fraction of the surviving population after each of the four rounds of  
161 infection as well as from the initial uninfected cells, and high throughput sequencing of

162 integrated sgRNA templates was performed to indirectly quantify the abundance of the  
163 associated mutants. We found that as our screen progressed, as would be expected for  
164 a library under strong selection, representation became biased toward a subset of  
165 enriched genes (Fig. S2A). Statistical analysis was performed using the STARS  
166 algorithm, which integrates data from independent guides targeting the same gene to  
167 identify the most enriched genotypes (26).

168

169 We identified 13 loci with statistically significant enrichment ( $p < 0.001$ ) in both libraries  
170 after 4 rounds of infection (Fig. 2A). Unexpectedly, given our results with purified toxin,  
171 more than half of the enriched loci encoded factors associated with sphingolipid  
172 biosynthesis, and many were closely connected to synthesis of Gb3, the Stx receptor  
173 (Fig. 2B). For example, hits included the Golgi-localized enzymes A4GALT, which  
174 catalyzes the final step in Gb3 synthesis; B4GALT5, which catalyzes production of the  
175 A4GALT substrate lactosylceramide; and UGCG, which converts ceramide (a precursor  
176 for all glycosphingolipids) into glucosylceramide. Additional hits included the ER-  
177 localized SPTLC2, SPTSSA, and KDSR, all of which lie on the ceramide synthesis  
178 pathway, and ARF1, which indirectly regulates intracellular trafficking of  
179 glucosylceramide (27).

180

181 Enriched loci also included two genes, TM9SF2 and LAPTM4A, whose functions are  
182 largely unknown. Although both are members of larger gene families of structurally  
183 related proteins, only guide RNAs targeting these particular family members were found  
184 to be enriched, suggesting that they have specific functions conferring susceptibility to



185 EHEC infection (Fig. S2B). Human TM9SF2 has been reported to be a Golgi-resident  
186 transmembrane protein required for the Golgi localization of NDST1, a sulfotransferase  
187 (28). Its homologs in *Drosophila* (TM9SF2/4) and *Dictyostelium* (Phg1A/Phg1C) have  
188 been linked to innate immunity and membrane protein localization (29, 30). LAPT4A  
189 has been reported to encode a transmembrane protein localized to lysosomes and late  
190 endosomes. It has been linked to intracellular transport of nucleosides, multidrug  
191 resistance, and maintenance of lysosomal integrity (31–34). In addition to the  
192 enrichment of guides targeting TM9SF2, LAPT4A, and genes related to sphingolipid  
193 biosynthesis, our analysis detected enrichment for guides targeting several genes  
194 associated with cancer and cell proliferation (MLLT3, TFAP4, ZNF217, and DUSP6)  
195 (35–38).

196  
197 The prominence among our hits of Gb3-related genes was unanticipated, because our  
198 preliminary studies suggested that T3SS rather than Stx would exert the strongest  
199 selective pressure in our screen. T3SS from several organisms have been hypothesized  
200 to associate with lipid rafts (39–41), transient membrane microdomains which typically  
201 are enriched in sphingolipids (including Gb3) (19); however, studies of T3SS activity  
202 and host membrane components have generally focused on the importance of  
203 cholesterol, and a role for Gb3 in EHEC pathogenesis beyond that of Stx receptor has  
204 not been reported. To more precisely define the contribution of screen hits to  
205 susceptibility to EHEC infection, we developed assays that enabled the effects of Stx  
206 and T3SS on HT-29 cells to be investigated independently. Host cells were infected in  
207 parallel with an  $\Delta espZ$ , an  $\Delta espZ \Delta escN$  mutant (which lacks an ATPase essential for

208 T3SS activity), an  $\Delta espZ \Delta stx1 \Delta stx2$  mutant ( $\Delta\Delta stx$ , which does not produce Stx1 or  
209 Stx2), or mock infected, and the number of host cells present after 1 or 5 days of  
210 infection was determined (Fig. S1B). These experiments revealed similar marked  
211 declines in abundance of HT-29 cells 1 day post-infection with the type 3-active  $\Delta espZ$   
212 or  $\Delta espZ \Delta\Delta stx$  EHEC (to <20% of that seen in mock infected cells; Fig. 1B); in contrast  
213 the type 3-deficient but toxin-producing  $\Delta espZ \Delta escN$  infection had no significant effect  
214 on host cell abundance at this time point (Fig. 1B). However, in the subsequent 4 days,  
215 there was a marked difference in growth between cells infected with the  $\Delta espZ$  vs.  
216  $\Delta espZ \Delta\Delta stx$  strains. Population expansion of cells previously exposed to toxin ( $\Delta espZ$   
217 infection) was far slower than that of cells that were never exposed to the toxin ( $\Delta espZ$   
218  $\Delta\Delta stx$  infection) (Fig. 1C, Fig. S1B). The abundance of HT-29 cells infected with the  
219  $\Delta espZ \Delta escN$  strain also differed significantly from that of mock infected cells by day 5,  
220 likely further reflecting the consequence of toxin exposure at this time point. Collectively,  
221 these analyses demonstrate that the impact of T3SS is most clearly evident 1 day post  
222 infection, and can be differentiated from that of toxin via infection with the  $\Delta espZ \Delta\Delta stx$   
223 strain. In contrast, the effects of Stx are delayed and become more apparent 5 days  
224 post infection, and can be assayed in infection with the T3SS-deficient  $\Delta espZ \Delta escN$   
225 strain. Given that our screen included multiple rounds of 5-day outgrowth following  
226 infection (during which effects of Stx could manifest), we conclude that the screen  
227 enriched for mutants resistant to Stx as well as T3SS.

228

229 For initial validation of our screen hits, mutants corresponding to selected enriched loci  
230 were constructed and verified by Sanger sequencing or Western blot (Fig. S2C-E), and

231 their abundance (relative to mock infected cells) was assessed 5 days post-infection  
232 with  $\Delta espZ$  EHEC. In comparison to the HT-29 Cas9 control strain, all but one mutant  
233 (ARF1) had significantly enhanced abundance at 5 days post-infection (Fig. 2C),  
234 suggesting that our selection and analysis yielded robust and reliable data regarding  
235 susceptibility to EHEC infection.

236

### 237 **Sphingolipid biosynthesis facilitates T3SS killing**

238 Because the hits predicted to be involved in cell proliferation (i.e. DUSP6, TFAP4,  
239 ZNF217 and MLLT3) were less likely to be involved in EHEC pathogenesis per se, we  
240 chose to focus further studies on a subset of the sphingolipid biosynthesis mutants and  
241 on mutants in the largely uncharacterized loci TM9SF2 and LAPTM4A. In particular, we  
242 focused on factors mediating synthesis of glycosphingolipids, particularly A4GALT,  
243 which should only have impaired production of Gb3 and other globo-series  
244 glycosphingolipids (42), and UGCG, which is required for synthesis of all  
245 glycosphingolipids except galactosylceramines (43). ARF1 was also included, due to its  
246 contribution to intracellular trafficking of UGCG's product from the cis-medial Golgi to  
247 the trans Golgi network, where B4GALT5 and A4GALT are found (44). To assess the  
248 bacterial factors underlying the enrichment of these loci, mutants were first infected with  
249 the  $\Delta espZ \Delta \Delta stx$  strain or mock infected, and cell abundance was assessed one day  
250 following infection. Notably, all of the mutant cells displayed significantly elevated  
251 relative abundance compared to wt HT-29 cells (Fig. 3A). Coupled with our prior  
252 analyses of bacterial factors modulating host survival at this time point (Fig. 1B), these  
253 results suggest that these mutations confer resistance to  $\Delta espZ \Delta \Delta stx$  infection by

254 protecting against the effects of EHEC's T3SS, and thus that associated loci may play a  
255 role in the host cell response to T3SS. Of these factors, only ARF1 has previously been  
256 linked to T3SS-mediated processes; it is thought to facilitate insertion of the T3SS  
257 translocon during *Yersinia* infection (45) but has not been linked to T3SS activity in  
258 EHEC.

259  
260 The first effector translocated by EHEC's T3SS – Tir – is essential for the activity of this  
261 secretion system. In the absence of Tir, translocation of additional effectors does not  
262 occur, nor does the characteristic cytoskeletal rearrangement and formation of  
263 membrane “pedestals” underneath adherent bacteria (5, 46). Tir translocation can be  
264 assessed using a Tir-CyaA reporter fusion protein, followed by measurement of  
265 intracellular cAMP levels (47). We monitored translocation of this reporter, which is  
266 dependent on an intact T3SS, from wt EHEC into control HT-29 Cas9 cells and mutants  
267 that appeared resistant to the effects of T3SS. These experiments revealed significantly  
268 lower Tir translocation into all mutants than into control HT-29 cells, ranging from ~70%  
269 (A4GALT) down to ~10% (LAPTM4A) of wt levels (Fig. 3B). Consistent with this  
270 observation, immunofluorescence microscopy of wt and mutant HT-29 cells infected  
271 with wt EHEC revealed markedly fewer adherent bacteria and associated actin-rich  
272 pedestals. While EHEC formed pedestals on ~80% of infected wt HT-29 cells, pedestals  
273 were detected on only 18-35% of infected mutants tested, and fewer pedestals were  
274 generally observed per mutant cell (Fig. 3CDE, Fig. S3A). Collectively, these results  
275 indicate that the mutations rendering HT-29 cells less susceptible to the cytotoxic  
276 effects of EHECs T3SS all limit early steps in the T3SS effector translocation process,

277 although they do not fully disrupt this process. These results also demonstrate that the  
278 mutants identified in our screen are protective against EHEC even when its T3SS  
279 activity has not been augmented by mutation of  $\Delta espZ$ .  
280  
281 EHEC's T3SS machinery and associated effectors are similar to those of  
282 enteropathogenic *E. coli* (EPEC), a related pathogen that does not produce Shiga toxin  
283 but that also requires its T3SS to colonize and cause disease in the human intestine  
284 (48). We investigated whether the mutations that protect HT-29 cells from EHEC  
285 infection also render HT-29 less susceptible to EPEC. Wt and mutant HT-29 cells were  
286 infected with an EPEC  $\Delta espZ$  mutant that, like its EHEC counterpart, is reported to have  
287 increased cytotoxicity relative to the wt strain (13, 49) (Fig. S3B). All 5 mutants tested  
288 exhibited increased survival compared to the wt cells at 1 day post infection, and this  
289 increase was linked to the presence of a functional T3SS (Fig. S3C). Survival of the  
290 TM9SF2 and ARF1 mutants was particularly enhanced, with the number of infected  
291 cells nearing 50% of the mock infected controls, compared to the ~5% observed with wt  
292 HT-29. Overall, our observations suggest that host glycosphingolipids modulate T3SS-  
293 mediated cytotoxicity for both pathogens, although pathogen reliance on particular  
294 sphingolipids is not necessarily conserved. For example, the absence of A4GALT had a  
295 dramatic effect on EHEC cytotoxicity, but only a modest influence on EPEC cytotoxicity.  
296 Additionally, our results suggest that TM9SF2 may play a conserved role in facilitating  
297 the activity of the EHEC and EPEC T3SS.  
298

299 Given previous reports that lipid rafts may promote T3SS activity, that Gb3 high-density  
300 association within lipid rafts is important for Stx binding (50), and our screen's  
301 identification of numerous sphingolipid-related loci, we hypothesized that TM9SF2 and  
302 LAPTM4A mutants might be less susceptible to EHEC infection due to alterations in  
303 lipid raft production or dynamics. To explore these possibilities, we compared the  
304 trafficking in control, TM9SF2 and LAPTM4A cells of a chimeric GPI-anchored GFP  
305 construct (GPI-GFP), which is transported to the plasma membrane where it becomes  
306 enriched in lipid rafts (51). Cell surface fluorescence was similarly homogenous in all  
307 three genetic backgrounds, and we could not detect consistent differences in steady  
308 state plasma membrane fluorescence between the 3 samples (Fig. S3D). To determine  
309 if kinetics of trafficking and insertion might nevertheless differ between wt and mutant  
310 cells, we performed quantitative photobleaching. The rate of signal decay was similar  
311 for all 3 backgrounds, suggesting that bulk plasma membrane trafficking and lipid raft  
312 insertion is not grossly disrupted in TM9SF2 and LAPTM4A cells (Fig. S3E). Further  
313 studies will be needed to define the precise means by which these mutations, as well as  
314 others tested above, limit susceptibility to EHEC and EPEC's T3SS.

315

### 316 **LAPTM4A and TM9SF2 are required for Gb3 biosynthesis**

317 As noted above, the effects of Stx on HT-29 abundance were evident 5 days post-  
318 infection, and could be clearly distinguished from those of EHEC's T3SS through  
319 infection with the Stx+ T3SS-deficient  $\Delta escN$  mutant (Fig. 1C). Therefore, we also  
320 compared the abundance of wt HT-29 cells and several mutants from our panel after  
321 challenge with the  $\Delta escN$  strain. As anticipated, mutants lacking the sphingolipid

322 biosynthesis factors A4GALT, UGCG, and SPTLC2 (all of which contribute to Gb3  
323 production) were far less susceptible to  $\Delta$ escN infection than wt HT-29 cells; at 5 days  
324 post infection, the abundance of these mutants did not differ from that of mock-infected  
325 controls (Fig. 4A). Intriguingly, the TM9SF2 and LAPTM4A mutants were also  
326 significantly more abundant than wt cells by 5 days post  $\Delta$ escN infection, suggesting  
327 that these factors not only contribute to resistance to T3SS-mediated cytotoxicity, but  
328 also could be host factors facilitating intoxication.

329

330 To begin to explore the means by which TM9SF2 and LAPTM4A mutations protect  
331 against Stx, we tested the capacity of mutants to bind to fluorescently tagged toxin. As  
332 controls, we also assayed A4GALT and UGCG mutants, which are known to be  
333 completely deficient in Gb3 production, and hence cannot bind Stx. Flow cytometry  
334 analyses, which were performed both in HT-29 (Fig. 4B) and HeLa (Fig. S4A) cells,  
335 revealed that there was a high (but not uniform) level of binding of Stx2 to both wt cell  
336 types. Notably, there was marked reduction in Stx binding in both the TM9SF2 and  
337 LAPTM4A mutant cells (Fig. 4B and Fig. S4A); these mutants bound equal to or less  
338 toxin than the A4GALT and UGCG mutants. The residual binding observed in all genetic  
339 backgrounds may reflect non-specific toxin adsorption or low level genetic heterogeneity  
340 in the CRISPR/Cas9-mutagenized lines.

341

342 Similarly, fluorescence microscopy, which was performed using wt HeLa cells and their  
343 derivatives due to their favorable imaging characteristics, did not reveal Stx binding to  
344 any of the mutants, even when cells were permeabilized to enable binding to

345 intracellular receptor (Fig. 4C, D). Thus, the TM9SF2 and LAPTM4A mutants'  
346 deficiencies in Stx binding do not appear to reflect impaired trafficking of Gb3 to the cell  
347 surface, but instead reflect defective synthesis and/or enhanced degradation of this  
348 glycosphingolipid.

349

350 To evaluate the specificity of the deficiency in the TM9SF2 and LAPTM4A HT-29  
351 mutants, we used flow cytometry to measure their capacity to bind cholera toxin (CT),  
352 which interacts with the glycosphingolipid GM1 (Fig. 2B) (52). In contrast to the near  
353 ablation of Stx binding in these mutants, there was a comparatively modest reduction in  
354 the binding of fluorescently labeled CT to these cells compared to wt HT-29 cells and  
355 A4GALT mutant cells (which produce normal amounts of GM1) (Fig. S4B). As expected,  
356 the UGCG cells showed a far more marked decrease in binding to cholera toxin, since  
357 UGCG is required for synthesis of GM1 (43). Collectively, these observations suggest  
358 that the TM9SF2 and LAPTM4A mutants' deficiencies in Stx binding reflect relatively  
359 specific reductions in production of Gb3 or related globo-series glycosphingolipids,  
360 rather than deficiencies that consistently impair synthesis or trafficking to the cell  
361 membrane of multiple surface receptors. Coupled with our analysis of the set of mutants  
362 that display reduced sensitivity to T3SS-mediated cytotoxicity, these observations  
363 suggest that reduced production of Gb3 likely contributes to the TM9SF2 and LAPTM4A  
364 mutants' resistance to the effects of EHEC's T3SS as well as to Stx.

365

366 To gain greater insight into the mechanism by which TM9SF2 and LAPTM4A enable  
367 infection by EHEC, we determined their subcellular localization in HeLa cells via



368 confocal microscopy. Consistent with previous reports (28), we found that TM9SF2 co-  
369 localized with GM130, a Golgi matrix protein (Fig. 5A). A subset of fluorescence  
370 emanated from nucleoli, potentially resulting from non-specific primary antibody binding,  
371 though Stx has been reported to be actively transported into nucleoli (53).  
372 Unexpectedly, as prior studies localized LAPTM4A to lysosomes (31-34), we found that  
373 a LAPTM4A-GFP fusion protein localized to the Golgi, like TM9SF2 (Fig. 5A).

374

375 The subcellular distribution of TM9SF2 and LAPTM4A raised the possibility that these  
376 proteins might enable EHEC infection by facilitating Gb3 biosynthesis, either by  
377 participating in Golgi-localization of precursor substrates or enzymes specifically, or by  
378 acting more generally as matrix proteins to ensure overall Golgi integrity. To investigate  
379 the former possibility, we immunolabeled the A4GALT enzyme in wt and in TM9SF2  
380 and LAPTM4A cells. A4GALT maintained proper Golgi localization in both mutant cell  
381 lines (Fig. 5B), suggesting that TM9SF2 and LAPTM4A are not required either for the  
382 production or distribution of A4GALT. To investigate if TM9SF2 and LAPTM4A might  
383 instead facilitate Gb3 trafficking by acting more generally in Golgi integrity, we  
384 performed qualitative and quantitative image analysis of both cis-medial- and trans-  
385 Golgi compartments. GM130 (a cis-medial Golgi marker) appeared morphologically  
386 normal in the mutant cells (Fig. S5A) and quantitative characterization of the trans-  
387 Golgi, where the final step in Gb3 biosynthesis is thought to occur, did not reveal  
388 differences in either the integrity (as measured by confocal Z-stack nominal 2-  
389 dimensional area) or localization (as measured by nuclear centroid displacement) of this

390 sub-compartment (Fig. S5BC). Further analyses will be required to identify the precise  
391 defect that leads to glycosphingolipid deficiency in these mutants.

392

## 393 **Discussion**

394 EHEC encodes two potent virulence factors that empower it to disrupt the colonic  
395 epithelium during infection: its T3SS, which enables intimate attachment of bacteria as  
396 well as translocation of multiple effectors that disrupt epithelial cell processes, and Stx,  
397 a potent translation inhibitor that triggers multiple stress responses in cells within and  
398 outside of the intestinal tract. These virulence factors were acquired by horizontal  
399 transmission in distinct steps in the pathogen's evolution (54) and are generally thought  
400 of as functionally independent. However, our CRISPR/Cas9-based screen for host  
401 mutants with reduced susceptibility to EHEC infection uncovered a remarkable overlap  
402 in host factors that mediate the response to these bacterial products. The screen for  
403 mutations enriched after infection with Stx+ and T3SS+ EHEC identified numerous loci  
404 known to be associated with sphingolipid and glycosphingolipid biosynthesis, in  
405 particular factors required for production of the Stx receptor Gb3, as well as two loci  
406 (TM9SF2 and LAPTM4A) with largely undefined cellular roles that were also required  
407 for toxin binding. Unexpectedly, mutants lacking these factors are also less susceptible  
408 to cytotoxicity associated with EHECs T3SS. These mutations interfered with early  
409 events associated with T3SS and Stx pathogenicity, markedly reducing entry of T3SS  
410 effectors into host cells and binding of Stx. Although the means by which these host loci  
411 and the processes associated with them are exploited by EHEC are not fully

412 understood, the convergence of Stx and T3SS onto overlapping targets raises intriguing  
413 possibilities for design of therapeutic agents countering EHEC infection.

414

415 Previous studies of Stx and EHEC T3SS have characterized some of the pathways  
416 through which these factors act upon host cells, such as the binding and retrograde  
417 transport that enables Stx to reach its intracellular target, the stress responses induced  
418 by Stx, the processes underlying formation of pedestals, and the targets and  
419 mechanisms of effectors (55–58). Notably, our findings suggest that disruption of only a  
420 subset of host genes provides protection against cytotoxicity when both virulence  
421 factors are present. Interestingly, we identified loci that influence early steps within  
422 virulence pathways, e.g., loci that are required for Stx binding to host cells or T3SS  
423 effector translocation rather than loci that mediate toxin trafficking (e.g., clathrin,  
424 dynamin, SNX1/2) (18) or interact with translocated effectors (e.g., N-WASP, IRTKS,  
425 IRSp53) (58–60). Such proximal factors have also been identified in other genome-wide  
426 CRISPR screens for host mutants resistant to cytotoxicity by other pathogens. For  
427 example, a *Yersinia* RNAi screen and our *Vibrio parahaemolyticus* CRISPR screen  
428 yielded loci that reduced effector translocation (23, 45). For EHEC virulence factors,  
429 disrupting early steps in their interactions with host cells may be particularly protective  
430 because these virulence factors disrupt multiple cellular processes once internalized; for  
431 example, inactivation of the host response to a single T3SS effector may still leave cells  
432 vulnerable to the activity of other growth-interfering effectors.

433

434 Early steps in the interactions between host cells and EHEC's virulence factors were  
435 also likely identified in our screen because of the previously unrecognized overlap  
436 between host factors utilized by T3SS and Stx at the start of their encounters with  
437 epithelial cells. We found that mutants with disrupted synthesis of Gb3, which were  
438 expected to be resistant to Stx-mediated growth inhibition, also exhibited an unexpected  
439 reduction in their sensitivity to T3SS-mediated cytotoxicity that was associated with  
440 reduced translocation of Tir. A majority of these mutants also exhibited reduced  
441 susceptibility to EPEC infection, suggesting that common host processes may mediate  
442 the actions of EHEC and EPEC's related T3SS.

443

444 Although many mutants identified by our screen share the characteristic of lacking Gb3,  
445 it is unlikely that this deficit is the sole factor underlying their resistance to T3SS.  
446 Mutants lacking A4GALT, UGCG, TM9SF2 and LAPTM4A appear equally devoid of  
447 extracellular Gb3 in assays of Stx binding; however, they exhibit varying degrees of  
448 resistance to  $\Delta espZ$  EHEC. T3SS resistance is also not fully correlated with the extent  
449 to which Tir translocation into these cells is reduced. These observations suggest that  
450 the reduction in Gb3 levels is associated with additional cellular changes (e.g., in overall  
451 sphingolipid homeostasis, membrane/lipid raft composition, or intracellular trafficking)  
452 that also modulate the host response to EHEC infection.

453

454 The means by which mutations in TM9SF2 and LAPTM4A prevent accumulation of Gb3  
455 remain to be determined. We found that both proteins are localized within the Golgi,  
456 raising the possibility that they modulate the activity, localization, or transport of

457 glycosphingolipid biosynthetic factors, which also occurs within this organelle. TM9SF2  
458 was previously found to regulate the localization of NDST1, a Golgi localized enzyme  
459 that catalyzes N-sulfation of heparan sulfate, and to be required for accumulation of  
460 NDST1's reaction product (28). TM9SF2 and the associated heparan sulfate N-sulfation  
461 are important for host cell binding and entry by CHIKV virus (28); however, the absence  
462 of other hits associated with heparan sulfate in our screen suggests that this phenotype  
463 is not related to our results. Minor abnormalities in several other glycosylation pathways  
464 were also associated with TM9SF2 disruption, but the underlying mechanism was not  
465 determined. We found that TM9SF2 is not required for correct localization or  
466 accumulation of A4GALT, suggesting that TM9SF2 may act prior to the terminal step of  
467 Gb3 synthesis. Similarly, LAPTM4A mutation did not appear to modulate A4GALT  
468 production or localization. It is unclear why previous studies have observed LAPTM4A  
469 in lysosomes and late endosomes rather than the Golgi localization that we detected;  
470 further studies will be needed to dissect the targeting and activity of LAPTM4A and its  
471 relationship to production of Gb3. Protein annotation and studies in the mouse homolog  
472 (MTP) suggest LAPTM4A may be involved in intracellular transport of nucleosides (61).  
473 Together with its Golgi localization shown herein, LAPTM4A could be involved in  
474 transporting activated sugars to the Golgi lumen, to supply precursors for Gb3  
475 biosynthesis.

476

477 Although EHEC is susceptible to common antibiotics, antibiotic treatment is generally  
478 contraindicated during EHEC infection, as antibiotics can increase production and  
479 release of Stx, leading to the development of HUS (62). A variety of alternative

480 therapies have been proposed to counter the effects of toxin, including compounds that  
481 sequester or neutralize toxin, block its binding to host cells, or disrupt toxin  
482 internalization, processing, or intracellular activity (63). Their activity has largely been  
483 tested in toxin-treated cell lines; a few have also been studied in animal models, but not  
484 in the context of EHEC infection. Our results suggest that a subset of these compounds,  
485 namely those that alter production of Gb3, may reduce pathogenesis associated with  
486 T3SS as well as Stx, and thus may be particularly effective in countering EHEC  
487 infection. Further studies of these and related compounds may enable identification of  
488 agents that counter host susceptibility to translocation of EHEC's T3SS effectors as well  
489 as to the effects of Stx, which could hold high therapeutic potential. Thus, our  
490 identification of host factors related to both T3SS and Stx susceptibility provides  
491 guidance in prioritizing the development of therapeutics aimed at countering EHEC  
492 pathogenesis.

493

## 494 **Materials and Methods**

### 495 **Bacterial strains, plasmids and growth conditions**

496 All bacterial strains and plasmids used in this study are listed in Table S1. Primers used  
497 in strain construction are shown in Table S1. Bacterial strains were cultured in LB  
498 medium or on LB agar plates at 37°C unless otherwise specified. Antibiotics and  
499 supplements were used at the following concentrations: carbenicillin: 50µg/ml;  
500 ampicillin: 100ug/mL; chloramphenicol: 20µg/ml; kanamycin: 50µg/ml; streptomycin:  
501 200µg /ml; IPTG: 1ug/ml. The EHEC  $\Delta espZ$  deletion mutant was constructed by allelic  
502 exchange using a derivative of the suicide vector pDM4 that included *espZ*-flanking

503 sequences (64). Deletion of *stx1*, *stx2* and *escN* was performed using lambda-red  
504 mediated recombination (65).

### 505 **Eukaryotic cell lines and growth conditions**

506 HT-29, HeLa and 293T cells and their derivatives were cultured in DMEM supplemented  
507 with 10% fetal bovine serum. Cells were grown at 37°C with 5% CO<sub>2</sub> and routinely  
508 passaged at 70-80% confluency; media was replenished every 2-3 days.

### 509 **Positive selection screen using the HT-29 CRISPR AVANA libraries**

510 The HT-29 libraries were constructed as described (23) using the AVANA sgRNA  
511 library, which contains four sgRNAs targeting each of the human protein coding genes  
512 (26). For each library, two sets of 7 T225 flasks were seeded with  $12.5 \times 10^6$  cells per  
513 flask, then incubated for 48 hours. At the time of the screen there were  $175 \times 10^6$  cells  
514 per experimental condition, corresponding to ~2000X coverage per perturbation. Cells  
515 were at ~70% confluency at the time of infection. One set of flasks served as an  
516 uninfected control; the second was infected with the EHEC  $\Delta espZ$  strain. Cells were  
517 harvested from the control at the time of infection.

518

519 For infection, the  $\Delta espZ$  strain was grown overnight statically in LB media to an OD<sub>600nm</sub>  
520 of 0.6, then centrifuged and resuspended at OD<sub>600nm</sub> 0.5 in DMEM. HT-29 cells were  
521 infected with EHEC  $\Delta espZ$  at an MOI=100 and incubated under standard culture  
522 conditions for 6 hours, with a media change at 3 hr post-infection to remove  
523 nonadherent bacteria and prevent media acidification. At 6-hour post-infection, cells  
524 were washed 3 times with 1X DPBS to remove nonadherent bacteria, then replenished

525 with fresh media supplemented with 1X antibiotic-antimycotic solution (ABAM) (Gibco-  
526 containing 100ug/mL streptomycin) and gentamicin 100ug/ml (Gent) (“stop medium”).  
527 After overnight incubation, fresh “stop medium” was added to each flask. Flasks were  
528 monitored daily by inverted light microscopy to follow the recovery of survivor cells.  
529 Upon reaching 70% confluency, the cells were trypsinized, pooled and re-seeded for the  
530 next round of infection, always keeping a minimum number of  $80 \times 10^6$  cells to maintain a  
531 coverage of at least 1000X. The infection and selection procedure was repeated for the  
532 second, third and fourth rounds of infection. Additionally, a subset of cells from each  
533 population were used for preparation of genomic DNA.

534

### 535 **Genomic DNA preparation, sequencing and STARS analyses of screen results**

536 Genomic DNA (gDNA) was extracted from  $100 \times 10^6$  input cells (uninfected) and after  
537 each round of infection with EHEC  $\Delta espZ$  (rounds 1, 2, 3 and 4) using the Blood and  
538 Cell Culture DNA Maxi Kit from Qiagen. The gDNA was subjected to PCR to amplify  
539 guide RNA sequences as previously described (26). The read counts were first  
540 normalized to reads per million within each condition by the following formula: reads per  
541 sgRNA/total reads per condition  $\times 10^6$ . Reads per million were then log2-transformed by  
542 first adding 1 to all values, in order to take the log of sgRNAs with zero reads. For  
543 analyses, the log2 fold-change of each sgRNA was determined relative to the input  
544 sample for each biological replicate (Table S2). The STARS algorithm for CRISPR-  
545 based genetic perturbation screens was used to evaluate the rank and statistical  
546 significance of the candidate genes as described (26).

547



## 548 **Construction of HT-29 Cas9 and HeLa cells with targeted gene disruptions**

549 The sgRNA sequences used for construction of HT-29 Cas9 mutant cells are shown in  
550 Table S3. All sgRNA oligo sequences were obtained from Integrated DNA Technologies  
551 and cloned into the pLentiGuide-Puro plasmid as previously described (23). Briefly, 5µg  
552 of plasmid pLentiGuide-Puro was digested with *BmsBI* (Fermentas) and purified using  
553 the QIAquick Gel extraction kit. Each pair of oligos was annealed and phosphorylated  
554 with T4 PNK (NEB) in the presence of 10X T4 DNA ligase buffer in a thermocycler with  
555 the following parameters: i) incubation for 30 minutes at 37°C, ii) incubation at 95°C for  
556 5 min with a ramp down to 25°C at 5°C per minute. Oligos were then diluted 1:200 and  
557 1µl of the diluted oligo mixture was ligated with 50ng of *BsmBI* digested plasmid.  
558 Ligations were transformed into STBL3 bacteria, and transformed clones were checked  
559 by PCR and DNA sequencing. sgRNAs cloned into pLentiGuide-Puro were transduced  
560 into HT-29 Cas9 cells as described below, and after 10 days of selection with  
561 Puromycin (1µg/ml), the extent of disruption of the targeted gene was analyzed by  
562 immunoblotting for the corresponding gene product or Sanger sequencing (Fig. S2C).

## 563 **Lentivirus Preparation and Transductions**

564 Lentiviral transductions were performed as previously described (23). Briefly, all  
565 lentiviruses were made by transfecting 293T cells using TransIT-LT1 transfection  
566 reagent, the lentiviral packaging plasmids psPAX2 and pCMV-VSVG and the  
567 corresponding cargo plasmid according to the manufacturer's protocol. 48h following  
568 transfection, 293T culture supernatant was harvested, filtered through a 0.22µm pore  
569 filter, and added to target HT-29 or HeLa cells grown to 70-80% confluency in 6-well  
570 plates; a second virus supernatant were harvested 72 hr after transfection and added to

571 target cells. After each virus' supernatant addition to HT-29 cells, spin infection was  
572 performed by adding 8µg/ml polybrene and spinning the 6-well plates were at 1600g for  
573 2h at 30°C; HT-29 cells were then returned to 37°C. Puromycin selection for positive  
574 transductants was initiated the following day. For transduction of HeLa cells, spin  
575 infection was not performed.

576

### 577 **Cell survival assays**

578 For cell survival assays,  $5 \times 10^5$  HT-29 cells were seeded into 6-well plates and grown for  
579 48 hours in DMEM supplemented with 10% FBS. EHEC (or EPEC) strains for infections  
580 were prepared as for library infections described above. HT-29 cells were infected at an  
581 MOI=100 (or with uninoculated media in the case of mock infection), with media  
582 changes and infection termination as for library infection. Mock infected cells were fed  
583 but not passaged during the outgrowth period. Following infection and outgrowth for 1 or  
584 5 days, cells were quantified by Trypan Blue (0.4% trypan blue) exclusion using a  
585 Countess II Automated Cell Counter (Thermo Fisher Scientific). Cell survival after EPEC  
586 infection was measured 4 hr post-infection.

587

### 588 **Stx cytotoxicity assay and measurement of Stx released during infection**

589 HT-29 cells were seeded at  $1 \times 10^6$  cells/ well the day before the assay. Cell monolayers  
590 were then exposed to a range of concentrations of pure Stx1 or Stx2 holotoxins for 6  
591 hours. Cell survival was measured by Trypan Blue exclusion as described above, then  
592 % of survival was calculated in comparison to HT-29 controls that did not receive toxin

593 treatment. Stx released during infection of HT-29 cells at 3hr and 6hr was measured by  
594 ELISA, as described (66).

595

### 596 **Tir Translocation Assays**

597 The Tir translocation assay was performed as previously described (47). Briefly: HT-29  
598 cells were plated at  $1 \times 10^5$  cells/well in 96 wells and assayed at confluency. EHEC  
599 strains harboring Tir-CyaA fusion or CyaA vector control were grown in LB overnight  
600 then diluted 1:100 in DMEM and grown to OD600 = 0.6 shaking at 37C. Cells were  
601 infected with MOI 100:1 for 90 minutes; cAMP was measured by ELISA using Biotrack  
602 cAMP kit (Amersham) according to manufacturer's instructions.

603

### 604 **Immunoblot analyses**

605 Mammalian cell lysates were prepared with RIPA buffer and protein concentrations  
606 were determined using BCA protein assay. 10ug of protein lysate was mixed with  
607 NuPAGE LDS sample buffer (Invitrogen) with 50mM DTT, separated by NuPAGE Bis-  
608 Tris gel electrophoresis and transferred to nitrocellulose membranes. Antibodies and  
609 concentrations used are listed in KEY RESOURCES TABLE. Blots were developed with  
610 the SuperSignal West Pico ECL kit, and imaging was performed on the Chemidoc  
611 Touch Imaging System (Biorad).

### 612 **Immunofluorescence**

613 HT-29 cells or HeLa cells were seeded in 12-well plates on 18mm glass coverslips or 4-  
614 well chambers (Mat-TEK). Cells were fixed with 2% paraformaldehyde (PFA) for 20  
615 minutes at room temperature, washed with 1X PBS 3 times, then permeabilized with

616 0.1% Triton X-100 in PBS for 30 minutes (except for cells stained for TM9SF2, which  
617 were subjected to combined fixation and permeabilization in ice cold methanol for 10  
618 minutes). Cells were blocked in 5% normal goat serum in PBS (blocking buffer) for 1  
619 hour, followed by overnight incubation with primary antibodies (Table S4) at 4°C. Cells  
620 were then washed 3 times with PBS followed by incubation with fluorescently-labeled  
621 secondary antibody for 1 hour at room temperature. Cells were counterstained with  
622 Alexa-568 Phalloidin and DAPI for actin cytoskeleton and nuclei, respectively. For  
623 extracellular binding of Alexa-488-tagged Stx, cells were not permeabilized; for  
624 intracellular binding, cells were permeabilized and stained as described above.

625

#### 626 **LAPTM4A subcellular localization**

627 HeLa Cas9 cells were plated on coverslip and transfected with LAPTM4A-GFP  
628 (Origene) per the manufacturer's protocol (Mirus). 24 hours later, cells were processed  
629 for immunofluorescence as above. GFP was imaged directly without additional signal  
630 amplification.

631

#### 632 **Fluorescent actin staining (FAS)**

633 FAS assays were performed as described (67) with minor modifications. Briefly, HT29  
634 cells were seeded at  $1 \times 10^6$  cell/well in 4-well chambers in DMEM + FBS. Three days  
635 after confluency, cells were infected with EHEC strains expressing GFP at an MOI=100  
636 for 6 hours, with a media change after 3hr. After infection, cells were washed three  
637 times with PBS, fixed with 2% PFA and permeabilized with 0.2% Triton X-100. Cells  
638 were then stained with Alexa-633 Phalloidin and DAPI for visualization of actin

639 cytoskeleton and cell nuclei. Slides were mounted using Prolong Diamond Antifade and  
640 analyzed by confocal microscopy. The experiment was repeated at least 3 times, and  
641 250 cells were counted in total. The percentage of infected cells was determined by  
642 analyzing at least 20 random fields across different experiments; numbers of pedestals  
643 were determined by counting AE lesion in 100 infected cells. All comparisons were  
644 relative to HT-29 cells.

645

#### 646 **Lipid raft assay**

647 For imaging of GFP-GPI, the indicated cells were split into 12-well glass bottom plates  
648 (MatTek). 1 day later, cells were transfected with GFP-GPI using TransIT-LT1 reagent  
649 following the manufacturer's recommended protocol (Mirus). 24 hours later, cells were  
650 washed and then imaged in FluoroBrite-DMEM (Invitrogen), with live fields of single  
651 confocal slices of cell bottoms taken for 1 minute using 1 second exposures at 75%  
652 laser power. ROI mean intensities (with ROI drawn to avoid overlapping cell protrusions  
653 and saturated pixels) were calculated for each frame using the Plot Z-axis profile  
654 function in ImageJ. Greater than 20 cells and at least 20 movies were analyzed for each  
655 condition. Results are expressed as mean +/- SEM.

656

#### 657 **Golgi complex morphological analyses**

658 Golgi integrity was assayed by calculation of the mean distance between the manually  
659 defined weighted centroid of nucleus (as defined by DAPI staining) and trans-Golgi (as  
660 defined by TGN46 staining), and from 2-dimensional area of manually defined ROI of

661 maximum-intensity projection of individual confocal slices of TGN46 staining. At least 20  
662 cells were analyzed for each condition. Results are expressed as mean +-SEM.

663

### 664 **Shiga toxin labeling and Flow Cytometry (FACS)**

665 Shiga toxins 1 and 2 (holotoxins) were obtained from Tufts Medical Center; cholera  
666 toxin was purchased from Sigma. All toxins were diluted in PBS and labeled with  
667 Alexa488 or Alexa647 micro-labeling kit (Invitrogen) according to manufacturer's  
668 instructions. For FACS analysis of Stx binding, HT-29 cells were seeded at  $5 \times 10^5$   
669 cells/well in 6-well plates, while HeLa cells were seeded  $2.5 \times 10^5$  cells/well, then  
670 incubated for 24 hours. Cell monolayers were washed 3 times with EBSS, trypsinized,  
671 resuspended in PBS with labeled Stx (10nM) or CT (1nM), and incubated on ice for 30  
672 min. Cells were then centrifuged, resuspended in FACS buffer (DPBS + 10% FBS) and  
673 analyzed by flow cytometry.

674

### 675 **Statistical Methods**

676 Statistical analyses were carried out using a one-way ANOVA with Dunnet post-  
677 correction on GraphPad Prism5.

### 678 **Acknowledgements**

679 We gratefully acknowledge Professor James Kaper (University of Maryland) for  
680 providing EPEC strains and the Tir-cyaA plasmid, to Professor Yusuke Maeda (Osaka  
681 University) for providing anti-TM9SF2 antibody and to Professor Peter Howley for HeLa  
682 Cas9 parental cells. We thank Waldor lab members for helpful discussion about this

683 project. This work was supported by HHMI and R37 AI-042347 (MKW), B.S. was  
684 supported by National Sciences and Engineering Research Council of Canada  
685 (NSERC) PGS-D award (487259), J.E.L. was supported by the NIH under NRSA  
686 T32AI007061 from the NIAID.

687

## 688 **References**

- 689 1. Kaper JB, Brien ADO (2014) Overview and Historical Perspectives. 1–9.
- 690 2. Jarvis KG, et al. (1995) Enteropathogenic *Escherichia coli* contains a putative  
691 type III secretion system necessary for the export of proteins involved in attaching  
692 and effacing lesion formation. *J Clin Microbiol* 92(August):7996–8000.
- 693 3. Dettmar AK, et al. (2014) Protection of Human Podocytes from Shiga Toxin 2-  
694 Induced Phosphorylation of Mitogen-Activated Protein Kinases and Apoptosis by  
695 Human Serum Amyloid P Component. *J Biol Chem* 289(5):1872–1879.
- 696 4. Strockbine NA, et al. (1986) Two toxin-converting phages from *Escherichia coli*  
697 O157:H7 strain 933 encode antigenically distinct toxins with similar biologic  
698 activities. *Infect Immun* 53(1):135–140.
- 699 5. Kenny B, et al. (1997) Enteropathogenic *E. coli* (EPEC) transfers its receptor for  
700 intimate adherence into mammalian cells. *Cell* 91(4):511–520.
- 701 6. Jerse AE, Yu J, Tall BD, Kaper JB (1990) A genetic locus of enteropathogenic  
702 *Escherichia coli* necessary for the production of attaching and effacing lesions on  
703 tissue culture cells. *Proc Natl Acad Sci U S A* 87(20):7839–7843.
- 704 7. Tzipori S, et al. (1995) The role of the *eaeA* gene in diarrhea and neurological  
705 complications in a gnotobiotic piglet model of enterohemorrhagic *Escherichia coli*

- 706 infection. *Infect Immun* 63(9):3621–3627.
- 707 8. Ritchie JM, Thorpe CM, Rogers AB, Waldor MK (2003) Critical roles for stx2, eae,  
708 and tir in enterohemorrhagic *Escherichia coli*-induced diarrhea and intestinal  
709 inflammation in infant rabbits. *Infect Immun* 71(12):7129–7139.
- 710 9. Tobe T, et al. (2006) An extensive repertoire of type III secretion effectors in  
711 *Escherichia coli* O157 and the role of lambdoid phages in their dissemination.  
712 *Proc Natl Acad Sci U S A* 103(40):14941–14946.
- 713 10. Stevens MP, Frankel GADM (2014) The Locus of Enterocyte Effacement and  
714 Associated Virulence Factors of Enterohemorrhagic *Escherichia coli*. *Microbiol*  
715 *Spectr* 2(4):1–25.
- 716 11. Santos AS, Finlay BB (2015) Bringing down the host: Enteropathogenic and  
717 enterohaemorrhagic *Escherichia coli* effector-mediated subversion of host innate  
718 immune pathways. *Cell Microbiol* 17(3):318–332.
- 719 12. Mills E, Baruch K, Charpentier X, Kobi S, Rosenshine I (2008) Real-Time Analysis  
720 of Effector Translocation by the Type III Secretion System of Enteropathogenic  
721 *Escherichia coli*. *Cell Host Microbe* 3(2):104–113.
- 722 13. Berger CN, et al. (2012) EspZ of enteropathogenic and enterohemorrhagic  
723 *Escherichia coli* regulates type III secretion system protein translocation. *MBio*  
724 3(5). doi:10.1128/mBio.00317-12.
- 725 14. Steil D, et al. (2015) Shiga toxin glycosphingolipid receptors of Vero-B4 kidney  
726 epithelial cells and their membrane microdomain lipid environment. *J Lipid Res*  
727 56(12):2322–2336.
- 728 15. Zumbrun SD, et al. (2010) Human intestinal tissue and cultured colonic cells



- 729 contain globotriaosylceramide synthase mRNA and the alternate shiga toxin  
730 receptor globotetraosylceramide. *Infect Immun* 78(11):4488–4499.
- 731 16. Békássy ZD, et al. (2011) Intestinal damage in enterohemorrhagic *Escherichia*  
732 *coli* infection. *Pediatr Nephrol* 26(11):2059–2071.
- 733 17. Stone SM, et al. (2012) Shiga toxin 2-induced intestinal pathology in infant rabbits  
734 is A-subunit dependent and responsive to the tyrosine kinase and potential ZAK  
735 inhibitor imatinib. 2(November):1–11.
- 736 18. Johannes L, Romer W (2010) Shiga toxins--from cell biology to biomedical  
737 applications. *Nat Rev Microbiol* 8(2):105–116.
- 738 19. Kouzel IU, et al. (2013) Association of Shiga toxin glycosphingolipid receptors  
739 with membrane microdomains of toxin-sensitive lymphoid and myeloid cells. *J*  
740 *Lipid Res* 54(3):692–710.
- 741 20. Tesh VL (2013) Activation of Cell Stress Response Pathways By. 14(1):1–9.
- 742 21. Smith WE, et al. (2003) Shiga Toxin 1 Triggers a Ribotoxic Stress Response  
743 Leading to p38 and JNK Activation and Induction of Apoptosis in Intestinal  
744 Epithelial Cells. 71(3):1497–1504.
- 745 22. Jandhyala DM, et al. (2015) Activation of the Classical Mitogen-Activated Protein  
746 Kinases Is Part of the Shiga. *Infect Immun* 84(1):138–148.
- 747 23. Blondel CJ, et al. (2016) CRISPR / Cas9 Screens Reveal Requirements for Host  
748 Cell Sulfation and Fucosylation in Bacterial Type III Secretion System-Mediated  
749 Cytotoxicity. *Cell Host Microbe* 20(2):226–237.
- 750 24. Tao L, et al. (2016) Frizzled proteins are colonic epithelial receptors for *C. difficile*  
751 toxin B. *Nature* 538(7625):350–355.

- 752 25. Savidis G, et al. (2016) Identification of Zika Virus and Dengue Virus Dependency  
753 Factors using Functional Genomics. *Cell Rep* 16(1):232–246.
- 754 26. Doench JG, et al. (2016) Optimized sgRNA design to maximize activity and  
755 minimize off-target effects of CRISPR-Cas9. *Nat Biotechnol* 34(2):184–191.
- 756 27. Yamaji T, Hanada K (2015) Sphingolipid Metabolism and Interorganellar  
757 Transport: Localization of Sphingolipid Enzymes and Lipid Transfer Proteins.  
758 *Traffic* 16(2):101–122.
- 759 28. Tanaka A, et al. (2017) Genome-Wide Screening Uncovers the Significance of N-  
760 Sulfation of Heparan Sulfate as a Host Cell Factor for Chikungunya Virus  
761 Infection. *J Virol* 91(13):e00432-17.
- 762 29. Perrin J, et al. (2015) The nonaspanins TM9SF2 and TM9SF4 regulate the  
763 plasma membrane localization and signalling activity of the peptidoglycan  
764 recognition protein PGRP-LC in *Drosophila*. *J Innate Immun* 7(1):37–46.
- 765 30. Perrin J, et al. (2015) TM9 family proteins control surface targeting of glycine-rich  
766 transmembrane domains. *J Cell Sci* 128(13):2269–2277.
- 767 31. Hogue DL, Nash C, Ling V, Hobman TC (2002) Lysosome-associated protein  
768 transmembrane 4 alpha (LAPTM4 alpha) requires two tandemly arranged  
769 tyrosine-based signals for sorting to lysosomes. *Biochem J* 365(Pt 3):721–30.
- 770 32. Grabner A, et al. (2011) LAPTM4A interacts with hOCT2 and regulates its  
771 endocytotic recruitment. *Cell Mol Life Sci* 68(24):4079–4090.
- 772 33. Foster GH, Armstrong CS, Sakiri R, Tesh VL (2000) Shiga toxin-induced tumor  
773 necrosis factor alpha expression: requirement for toxin enzymatic activity and  
774 monocyte protein kinase C and protein tyrosine kinases. *Infect Immun*

- 775 68(9):5183–5189.
- 776 34. Milkereit R, Rotin D (2011) A role for the ubiquitin ligase Nedd4 in membrane  
777 sorting of LAPTM4 proteins. *PLoS One* 6(11):3–4.
- 778 35. Fleischmann KK, Pagel P, Schmid I, Roscher AA (2014) RNAi-mediated silencing  
779 of MLL-AF9 reveals leukemia-associated downstream targets and processes. *Mol*  
780 *Cancer* 13(1):1–14.
- 781 36. Wei J, et al. (2017) Overexpression of transcription factor activating enhancer  
782 binding protein 4 (TFAP4) predicts poor prognosis for colorectal cancer patients.  
783 *Exp Ther Med* 14(4):3057–3061.
- 784 37. Thollet A, et al. (2010) ZNF217 confers resistance to the pro-apoptotic signals of  
785 paclitaxel and aberrant expression of Aurora-A in breast cancer cells. *Mol Cancer*  
786 9:291.
- 787 38. Furukawa T, Sunamura M, Motoi F, Matsuno S, Horii A (2003) Potential tumor  
788 suppressive pathway involving DUSP6/MKP-3 in pancreatic cancer. *Am J Pathol*  
789 162(6):1807–1815.
- 790 39. Hayward RD, et al. (2005) Cholesterol binding by the bacterial type III translocon  
791 is essential for virulence effector delivery into mammalian cells. *Mol Microbiol*  
792 56(3):590–603.
- 793 40. Lafont F, Nhieu GT Van, Hanada K, Sansonetti P, Goot FG Van Der (2002) Initial  
794 steps of *Shigella* infection depend on the cholesterol / sphingolipid raft-mediated  
795 CD44 ± IpaB interaction. *EMBO J* 21(17):4449–4457.
- 796 41. van der Goot FG, Tran van Nhieu G, Allaoui A, Sansonetti P, Lafont F (2004)  
797 Rafts can trigger contact-mediated secretion of bacterial effectors via a lipid-

- 798 based mechanism. *J Biol Chem* 279(46):47792–47798.
- 799 42. Kojima Y, et al. (2000) Molecular cloning of globotriaosylceramide/CD77  
800 synthase, a glycosyltransferase that initiates the synthesis of globo series  
801 glycosphingolipids. *J Biol Chem* 275(20):15152–15156.
- 802 43. Yamaji T, Hanada K (2014) Establishment of HeLa cell mutants deficient in  
803 sphingolipid-related genes using TALENs. *PLoS One* 9(2):e88124.
- 804 44. Yamaji T, Hanada K (2015) Sphingolipid metabolism and interorganellar  
805 transport: localization of sphingolipid enzymes and lipid transfer proteins. *Traffic*  
806 16(2):101–122.
- 807 45. Sheahan KL, Isberg RR (2015) Identification of mammalian proteins that  
808 collaborate with type III secretion system function: involvement of a chemokine  
809 receptor in supporting translocon activity. *MBio* 6(1):1–13.
- 810 46. Jerse AE, Yu J, Tall BD, Kaper JB (1990) A genetic locus of enteropathogenic  
811 *Escherichia coli* necessary for the production of attaching and effacing lesions on  
812 tissue culture cells. *Proc Natl Acad Sci U S A* 87(20):7839–7843.
- 813 47. Crawford JA, Kaper JB (2002) The N-terminus of enteropathogenic *Escherichia*  
814 *coli* (EPEC) Tir mediates transport across bacterial and eukaryotic cell  
815 membranes. *Mol Microbiol* 46(3):855–868.
- 816 48. Kaper JB, Nataro JP, Mobley HLT (2004) Pathogenic *Escherichia coli*. *Nat Rev*  
817 *Microbiol* 2(2):123–140.
- 818 49. Kanack KJ, Crawford JA, Tatsuno I, Karmali MA, Kaper JB (2005) SepZ / EspZ Is  
819 Secreted and Translocated into HeLa Cells by the Enteropathogenic *Escherichia*  
820 *coli* Type III Secretion System. 73(7):4327–4337.

- 821 50. Hanashima T, et al. (2008) Effect of Gb3 in lipid rafts in resistance to Shiga-like  
822 toxin of mutant Vero cells. *Microb Pathog* 45(2):124–133.
- 823 51. Legler DF, Doucey MA, Schneider P, Chapatte L, Bender FC BC (2005)  
824 Differential insertion of GPI-anchored GFPs into lipid rafts of live cells. *Faseb J*  
825 19(1):73–5.
- 826 52. Saslowsky DE, et al. (2013) Ganglioside GM1-mediated Transcytosis of cholera  
827 toxin bypasses the retrograde pathway and depends on the structure of the  
828 ceramide domain. *J Biol Chem* 288(36):25804–25809.
- 829 53. Baibakov B, Murtazina R, Elowsky C, Giardiello FM, Kovbasnjuk O (2010) Shiga  
830 Toxin Is Transported into the Nucleoli of Intestinal Epithelial Cells via a Carrier-  
831 Dependent Process. 1:1318–1335.
- 832 54. Sadiq SM, Hazen TH, Rasko DA, Eppinger M (2014) EHEC Genomics : Past ,  
833 Present , and Future. *Microbiol Spectr* 2(3):1–13.
- 834 55. Sandvig K, van Deurs B (1996) Endocytosis, intracellular transport, and cytotoxic  
835 action of Shiga toxin and ricin. *Physiol Rev* 76(4):949–966.
- 836 56. Lee SY, Lee MS, Cherla RP, Tesh VL (2008) Shiga toxin 1 induces apoptosis  
837 through the endoplasmic reticulum stress response in human monocytic cells.  
838 *Cell Microbiol* 10(3):770–780.
- 839 57. Cantarelli V V, et al. (2007) Tyrosine phosphorylation controls cortactin binding to  
840 two enterohaemorrhagic Escherichia coli effectors: Tir and EspFu/TccP. *Cell*  
841 *Microbiol* 9(7):1782–1795.
- 842 58. Vingadassalom D, et al. (2009) Insulin receptor tyrosine kinase substrate links the  
843 E. coli O157:H7 actin assembly effectors Tir and EspF(U) during pedestal

- 844 formation. *Proc Natl Acad Sci U S A* 106(16):6754–6759.
- 845 59. Campellone KG, et al. (2008) Repetitive N-WASP-binding elements of the  
846 enterohemorrhagic *Escherichia coli* effector EspF(U) synergistically activate actin  
847 assembly. *PLoS Pathog* 4(10):e1000191.
- 848 60. Weiss SM, et al. (2009) IRSp53 links the enterohemorrhagic *E. coli* effectors Tir  
849 and EspFU for actin pedestal formation. *Cell Host Microbe* 5(3):244–258.
- 850 61. Cabrita MA, Hobman TC, Hogue DL, King KM, Cass CE (1999) Mouse  
851 Transporter Protein , a Membrane Protein That Regulates Cellular Multidrug  
852 Resistance , Is Localized to Lysosomes 1. (1):4890–4897.
- 853 62. Pacheco AR, Sperandio V (2012) Shiga toxin in enterohemorrhagic *E. coli* :  
854 regulation and novel anti-virulence strategies. 2(June):1–12.
- 855 63. Kavaliauskiene S, Dyvelingelem AB, Skotland T, Sandvig K (2017) Protection  
856 against shiga toxins. *Toxins (Basel)* 9(2):1–25.
- 857 64. Zhou X, et al. (2013) *Vibrio parahaemolyticus* T3SS Effector Mediates  
858 Pathogenesis by Independently Enabling Intestinal Colonization and Inhibiting  
859 TAK1 Activation. *CellReports* 3(5):1690–1702.
- 860 65. Datsenko KA, Wanner BL (2000) One-step inactivation of chromosomal genes in  
861 *Escherichia coli* K-12 using PCR products. *Proc Natl Acad Sci U S A*  
862 97(12):6640–6645.
- 863 66. Munera D, et al. (2014) Autotransporters but not pAA are critical for rabbit  
864 colonization by Shiga toxin-producing *Escherichia coli* O104:H4. *Nat Commun* 5.  
865 doi:10.1038/ncomms4080.
- 866 67. Knutton S, Baldwin T, Williams PH, McNeish AS (1989) Actin accumulation at

867 sites of bacterial adhesion to tissue culture cells: basis of a new diagnostic test for  
868 enteropathogenic and enterohemorrhagic *Escherichia coli*. *Infect Immun*  
869 57(4):1290–1298.

870

871

## 872 **Figure Legends**

873 **Figure 1. Design of a CRISPR/Cas9 screen to identify host factors underlying**  
874 **susceptibility to EHEC infection.** A) Schematic of the infection and outgrowth process  
875 for an HT-29 Cas9/CRISPR library undergoing multiple rounds of infection with  $\Delta espZ$   
876 EHEC, which has an active T3SS and secretes Stx1 and Stx2. B, C) Abundance of  
877 HT29 cells infected with the indicated strain relative to the abundance of mock-infected  
878 cells at day 1 (B) and day 5 (C) post-infection. Graphs display mean and SD from 3  
879 independent experiments. P values (\*\*P<0.01, \*\*\*\*P<0.0001)

880

881 **Figure 2. Mutations that disrupt sphingolipid biosynthesis and poorly**  
882 **characterized genes are enriched in the HT-29 CRISPR/Cas9 library following**  
883 **repeated infection with *espZ* EHEC.**

884 A) Scatterplot of the statistical significance in each library (A and B) associated with the  
885 genes ranked in the top 5% by the STARS algorithm. Genes with a p value  $\leq 0.001$  in  
886 both libraries (upper right quadrant) are named; genes within the ellipse all have p  
887 values  $< 2.0e^{-06}$ . B) Products of genes shown in (A) with  $p \leq 0.001$  in both libraries and  
888 schematic representation depicting the subcellular localization of enzymes (black) that  
889 contribute to sphingolipid biosynthesis. A subset of substrates/products are depicted in

890 red. C) Abundance of HT29 control and mutant cells infected with  $\Delta espZ$  EHEC relative  
891 to the abundance of mock-infected cells at day 5 post infection. Graphs display mean  
892 and SD from 3 independent experiments compared to HT-29 Cas9 (leftmost bar). P  
893 values (\*  $P < 0.05$ , \*\*  $P < 0.005$ , \*\*\*  $P < 0.001$ , \*\*\*\*  $P < 0.0001$ )

894

895 **Figure 3. Disruption of host sphingolipid biosynthesis genes and poorly**  
896 **characterized genes reduces the activity and cytotoxicity of EHEC's T3SS. A)**

897 Abundance of control and mutant HT29 Cas9 cells infected with  $\Delta espZ \Delta stx1 \Delta stx2$   
898 EHEC relative to the abundance of mock-infected cells at day 1 post infection. Graphs  
899 display mean and SD from 3 independent experiments. P values (\*  $P < 0.02$ , \*\*  $P < 0.01$ ,  
900 \*\*\*  $P < 0.001$ , \*\*\*\*  $P < 0.0001$ ) were obtained from one-way ANOVA with Dunnet post-

901 correction. B) Relative translocation of Tir-CyA from wt EHEC into HT-29 Cas9 control  
902 cells and the indicated HT-29 mutants, based on cAMP levels. Translocation into HT-29  
903 Cas9 control cells was set as 100%. Data reflect mean and SD from 3 independent  
904 experiments. P values (\*\*\*\*  $P < 0.0001$ ) are based on one-way ANOVA with Dunnet post-

905 correction. C) Confocal microscopy of control and mutant HT-29 Cas9 cells infected for  
906 6 hr with GFP-EHEC, then stained for F-actin with Alexa647-phalloidin (pink) and DAPI  
907 (blue; labels nuclei). Merged images are shown. Focal colocalization of bacteria and  
908 actin reflects formation of actin pedestals. White boxes show enlarged image, to

909 highlight pedestals. D) Percentage of the indicated host cells with actin pedestals 6 hr  
910 after infection. 250 cells were assessed for each host genotype. E) Number of pedestals  
911 per host cell; box plots show range (min to max) of pedestal numbers. 100 cells with AE  
912 lesions were counted per genotype. P values (\*\*\*\*  $P < 0.0001$ )



913

914 **Figure 4. TM9SF2 and LAPTM4A promote sensitivity to Stx.** A) Abundance of wt  
915 and mutant HT29 Cas9 cells infected with T3SS-deficient EHEC ( $\Delta espZ \Delta escN$ ) relative  
916 to the abundance of mock-infected cells at day 5 post infection. P values  
917 (\*\*\*\*  $P < 0.0001$ ) are based on one-way ANOVA with Dunnet post-test correction. B)  
918 Flow cytometry analysis of Stx2-Alexa647 binding to wt and mutant HT-29 Cas9 cells.  
919 Histograms show the distribution of fluorescence intensity in the total cell population in  
920 the presence and absence of toxin. C, D) Confocal microscopy of Stx2-Alexa488  
921 (green) binding to non-permeabilized (C) and permeabilized (D) control and mutant  
922 HeLa Cas9 cells. Cells were also stained with DAPI and Alexa568-phalloidin

923

924 **Figure 5. Subcellular localization of TM9SF2, LAPTM4A and A4GALT in wt and**  
925 **mutant HeLa cells**

926 A). Confocal immunofluorescence microscopy of HeLa cells stained with anti-TM9SF2  
927 (A; green) anti-GM130 to label the Golgi (pink) and DAPI. For LAPTM4A localization,  
928 HeLa cells were transfected with GFP-tagged LAPTM4A which was imaged directly  
929 after counterstaining as above. B) Confocal immunofluorescence microscopy of control  
930 and mutant HeLa Cas9 cells labeled with anti-A4GALT antibody (pink), anti-58K (red;  
931 labels Golgi) and DAPI (blue, labels nuclei). GM130 and 58K stain similar populations of  
932 Golgi membranes and were used interchangeably to accommodate the primary  
933 antibodies of interest.

934

935 **Supplemental Information captions**

936

937 **Figure S1. Cytotoxicity and host cell survival associated with various EHEC strains**

938 **and purified toxin.** A) Graphs show the abundance of HT29 cells infected with the

939 indicated strain relative to the abundance of mock-infected cells at day 1 post infection

940 with EHEC strains. Data reflect the mean +/- SD (n=3). P values (\* P<0.05, \*\* P<0.01,

941 \*\*\*\* P<0.0001) **B)** Kinetics of HT-29 cell death and recovery after challenge with  $\Delta espZ$

942 (red), the Shiga toxin-deficient  $\Delta espZ \Delta stx1 \Delta stx2$  (blue), the T3SS-deficient  $\Delta espZ$

943  $\Delta escN$  (green), or mock infected. Data are representative of 3 independent

944 experiments. **C)** Abundance of Shiga toxins 1 and 2 in media during infection of HT-29

945 cells with  $\Delta espZ$  and  $\Delta espZ \Delta stx1 \Delta stx2$  (negative control). Toxin levels were assayed at

946 3 hr post infection and at 6 hr post infection (3 hr post media change), using an ELISA

947 with antibody 4D1 which detects both toxins. **D)** Survival of HT-29 cells after 6 hours

948 intoxication with either pure Shiga toxin 1 or 2; UD = undetectable.

949

950 **Figure S2. CRISPR screen results and validation of mutations generated in**

951 **candidate loci.** A) Box plots showing the distribution of sgRNA frequencies in each HT-

952 29 CRISPR library prior to infection and following each round of infection with  $\Delta espZ$

953 EHEC. Line in the middle of the box indicates the median and whiskers comprise the

954 5th to 95th percentile. **B)** Heatmap of sgRNA enrichment in each HT-29 CRISPR library

955 after successive rounds of  $\Delta espZ$  EHEC infection. The heatmap shows each of the 4

956 sgRNAs targeting the genes; the darkness of the blue color correlates with the fold-

957 enrichment of the sgRNA compared to the input libraries. **C)** Western blot of whole cell

958 lysates of HT-29 Cas9 cells and CRISPR mutants. Arrows indicate the molecular weight

959 corresponding to each target protein. Antibodies used for validation are listed in Table  
960 S4. **D)** Analysis of indels in HT-29 mutants. Trace files show sequence reads indicating  
961 gene disruption at the sgRNA binding site on A4GAL and LAPTM4A mutants, compared  
962 to the gene in the parental cell line (WT). Red box outlines the sgRNA sequence.

963

964 **Figure S3.** A) Single channel and merged images corresponding to merged images  
965 shown in Fig 3C generated from confocal microscopy of control and mutant HT-29 Cas9  
966 cells infected for 6 hr with GFP-producing EHEC, then stained with Alexa-647-phalloidin  
967 and DAPI. Arrows in merged images indicate pedestals (arrow). B) Graphs show the  
968 abundance of HT29 cells infected with the indicated EPEC strain relative to the  
969 abundance of mock-infected cells 4hr-post-infection with EPEC. Data reflect the mean  
970 +/- SD (n=3). P values (\* P<0.05, \*\* P<0.01, # P<0.0001) C) Abundance of control and  
971 mutant HT29 Cas9 cells infected with *espZ* and *escN* EPEC relative to the abundance  
972 of mock-infected cells at 4 hr post-infection. Data correspond to mean and SD from 3  
973 independent experiments. P values (\*\* P<0.01) D) Analysis of lipid rafts components in  
974 control and mutant HeLa cells. Representative confocal slice of adherent cell bottom, 24  
975 hours after transfection with GFP-GPI which traffics to the plasma membrane and  
976 inserts preferentially into lipid rafts. E) Quantitation of lipid rafts in control HeLa Cas9  
977 cells and mutants. Total plasma membrane fluorescence (arbitrary fluorescence units)  
978 is depicted, along with kinetics of fluorescence decay with quantitative photobleaching.  
979 Data represent mean/SEM.

980

981 **Figure S4. Flow cytometry analyses of toxin binding to control and mutant host**  
982 **cells.** A) Flow cytometry analysis of Stx2-Alexa647 binding to control and mutant HeLa  
983 Cas9 cells. Histograms show HeLa cell population in the presence (pink) or absence  
984 (green) of toxin. B) Flow cytometry analysis of CT-Alexa647 binding to control and  
985 mutant HT-29 cells. Histograms show HT-29 cell population in the presence (pink) and  
986 absence (green) of toxin.

987

988 **Figure S5. Visualization and quantitative analysis of Golgi structure in control and**  
989 **mutant host cells.** A) Confocal immunofluorescence microscopy of Golgi structure in  
990 control and mutant HeLa Cas9 cells. Cis-medial Golgi (pink) were stained with anti-  
991 GM130, and nuclei (blue) were stained with DAPI. B) Confocal immunofluorescence  
992 microscopy of the trans-Golgi network (TGN) in control and mutant HeLa Cas9 cells.  
993 TGN was stained with TGN46 (green) and nuclei (blue) were stained with DAPI. C)  
994 Quantitative analysis of TGN morphology in control and mutant HeLa Cas9 cells, based  
995 on cell staining shown in (B). Distance of TGN from nuclei (left) and nominal TGN area  
996 (right) were determined for at least 20 cells.

997

998 **Table S1. Primers used to construct EHEC EDL933 mutants**

999 **Table S2. STARS analysis of Library B round 4**

1000 **Table S3. Sequence of sgRNAs and plasmids used to construct HT-29 Cas9 and**  
1001 **HeLa Cas9 CRISPR mutants**

1002 **Table S4. Antibodies used for western blot and immunofluorescence**

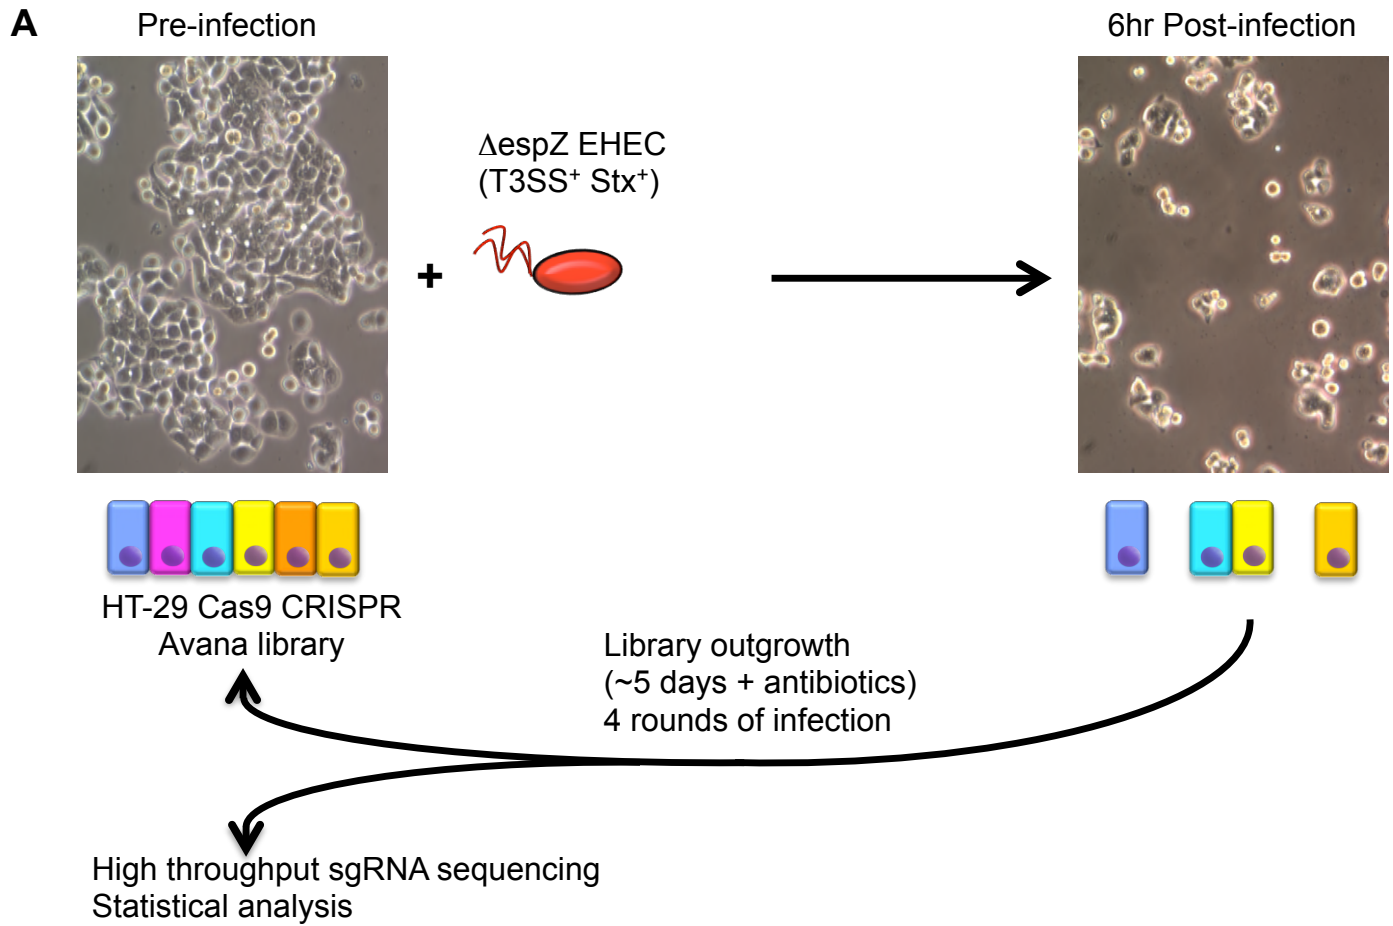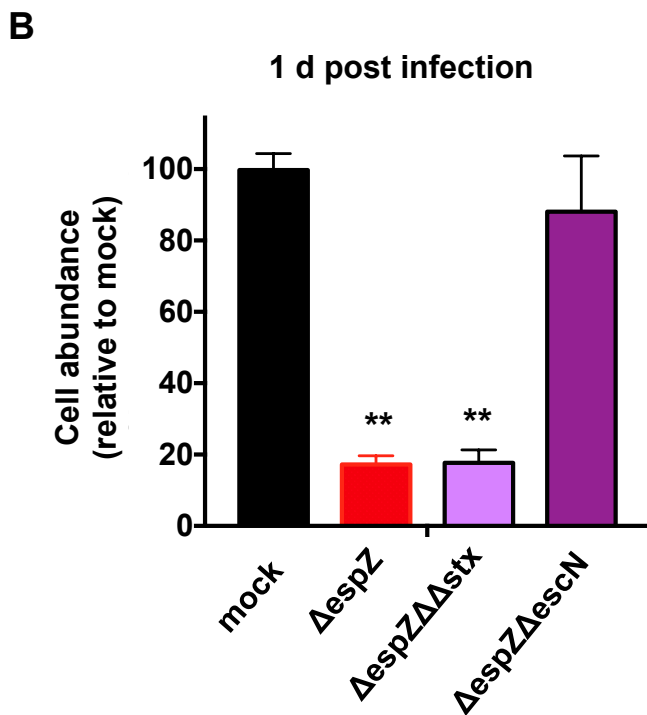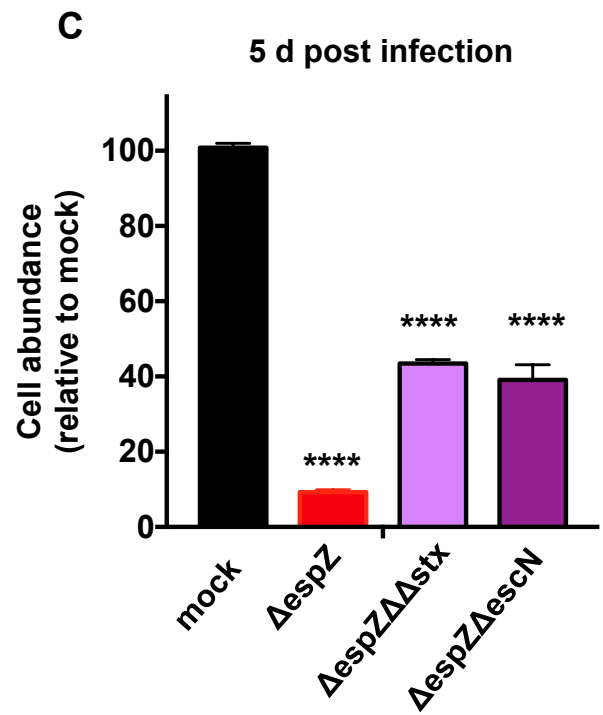

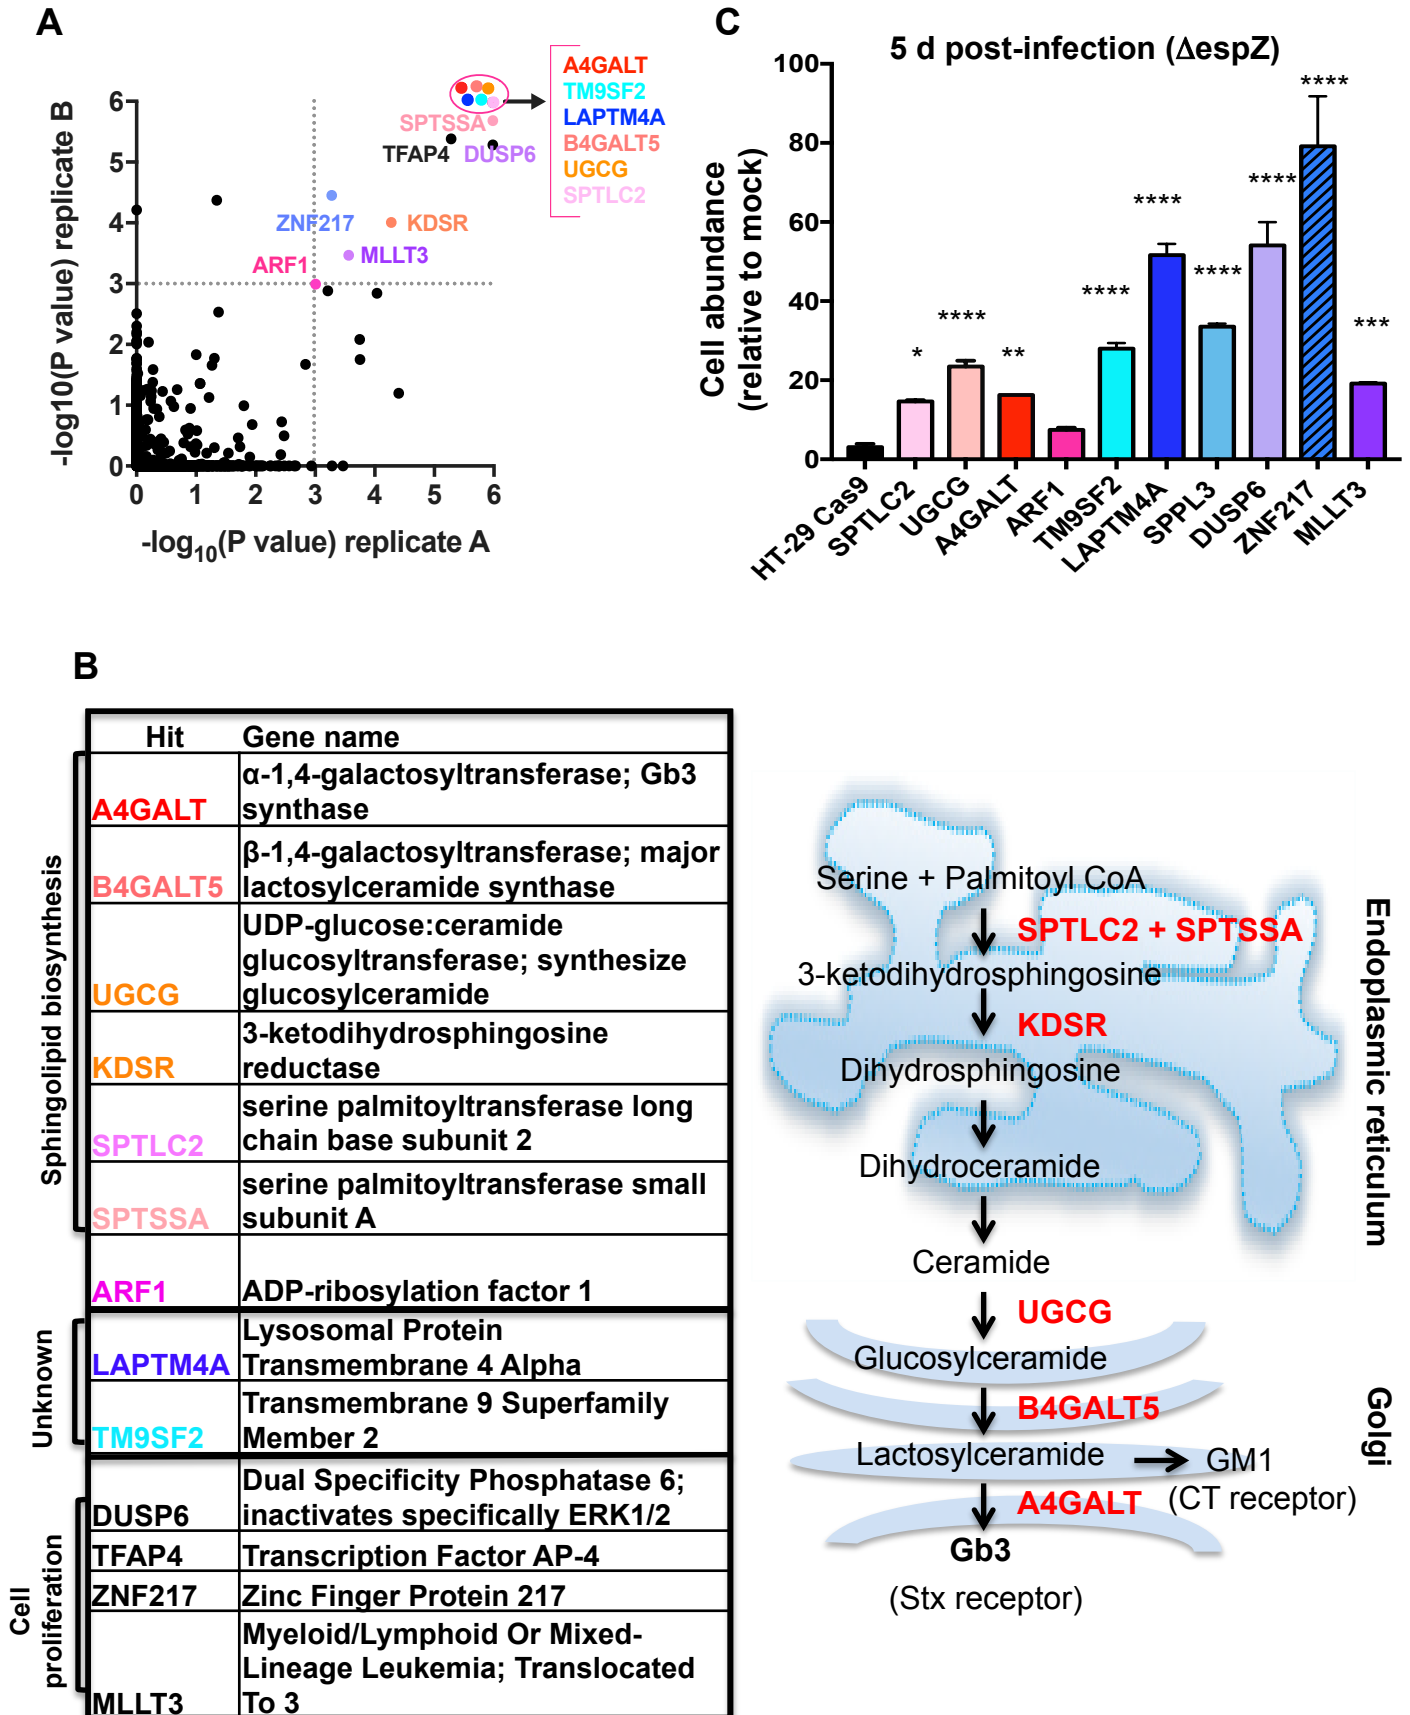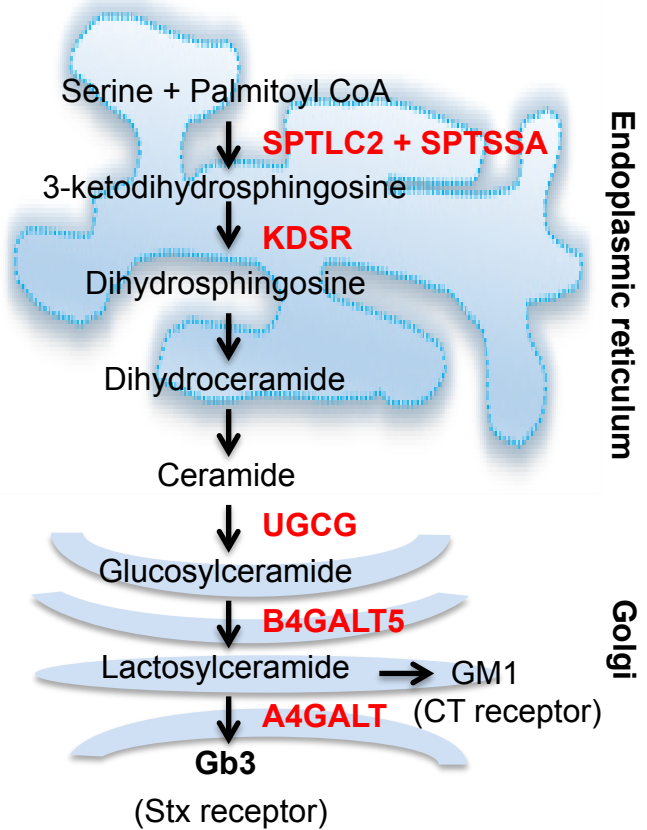

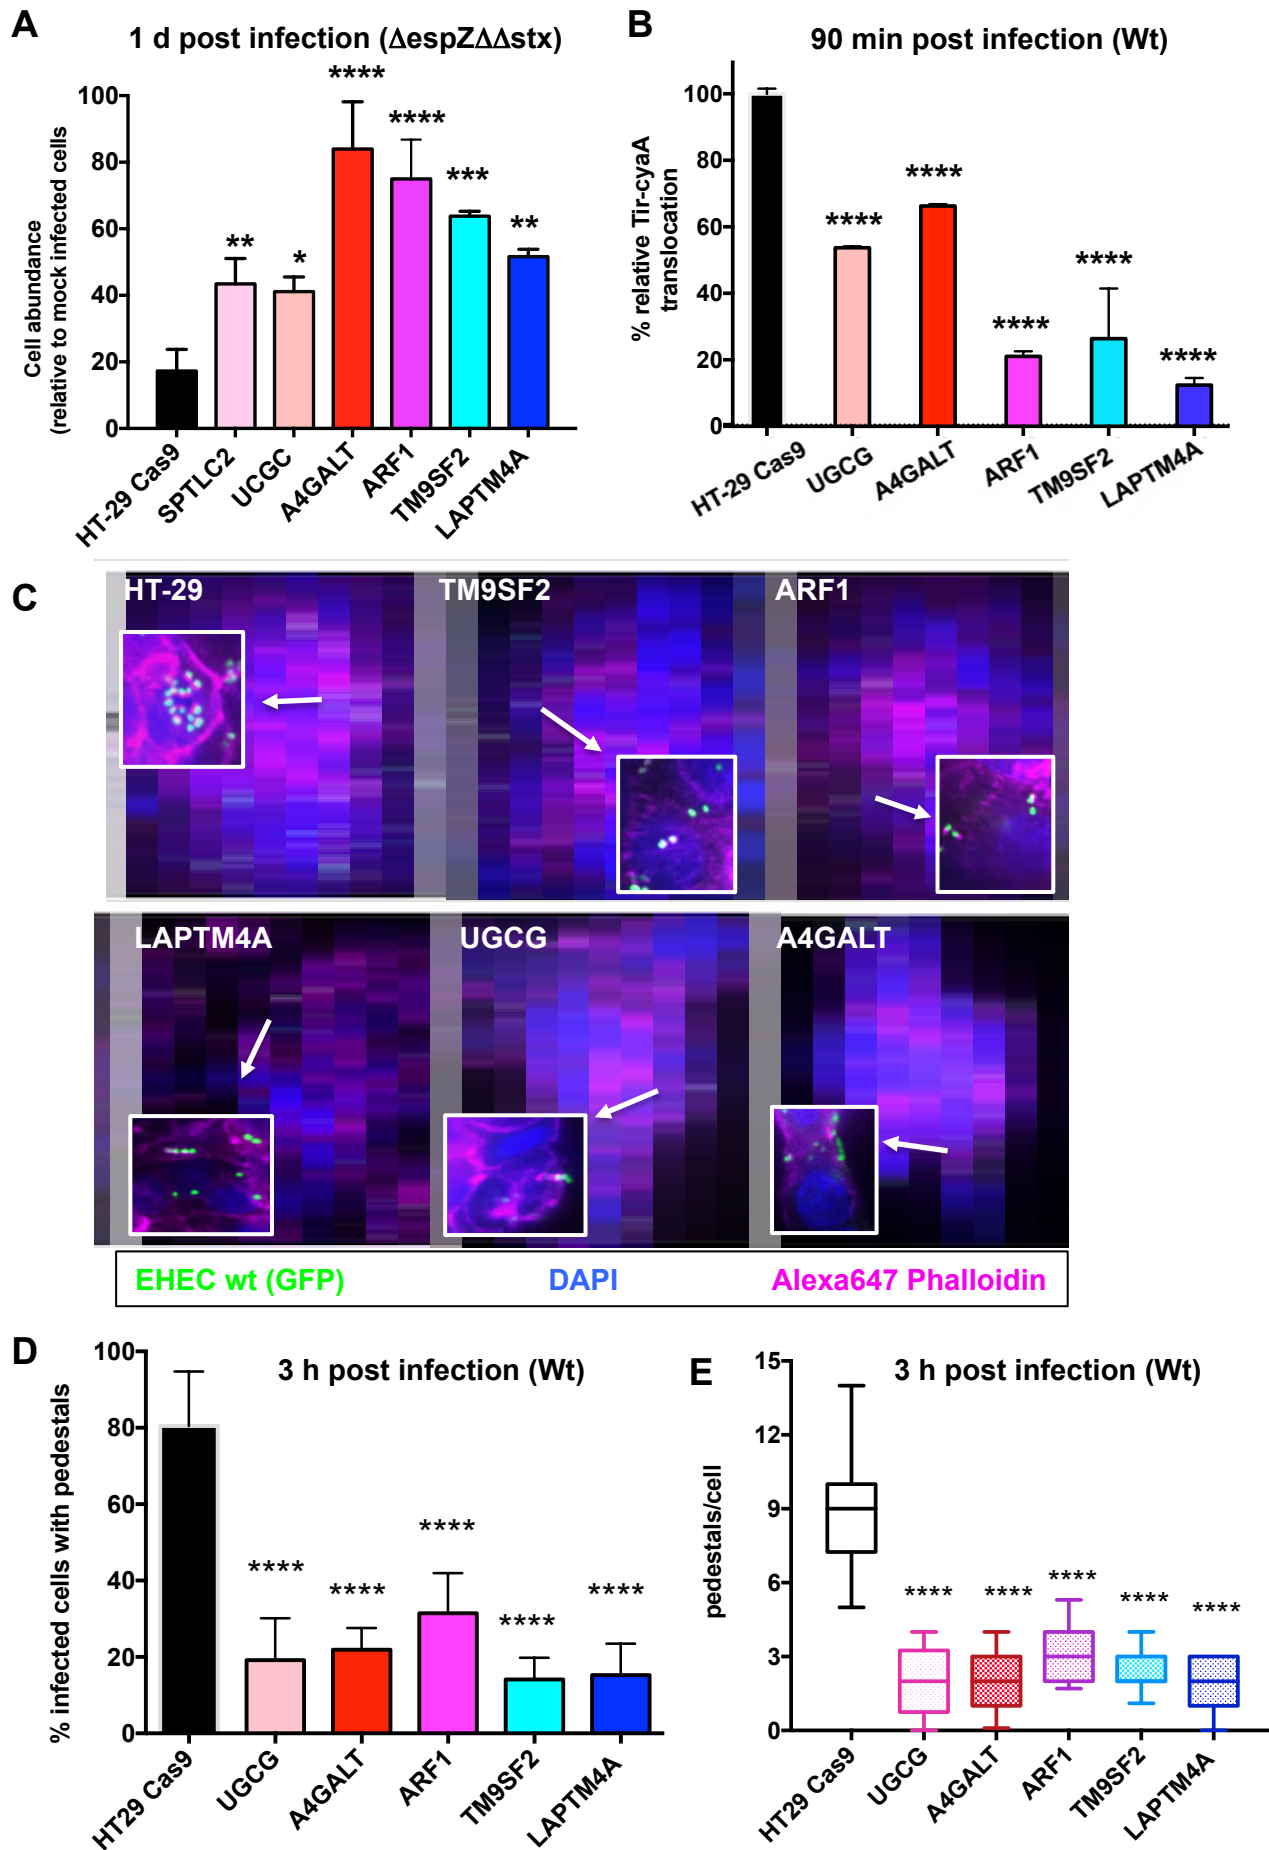

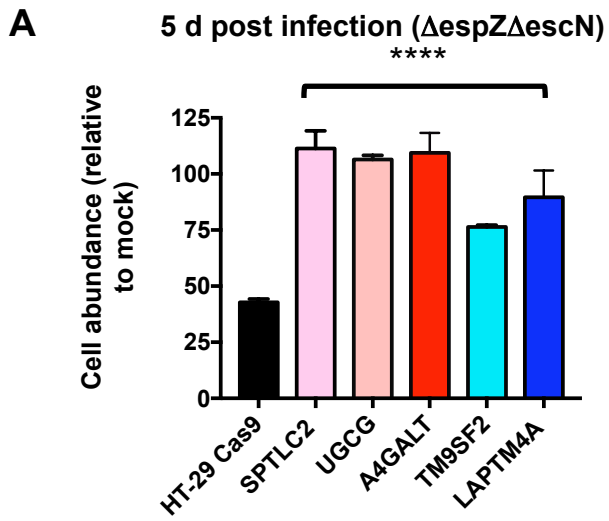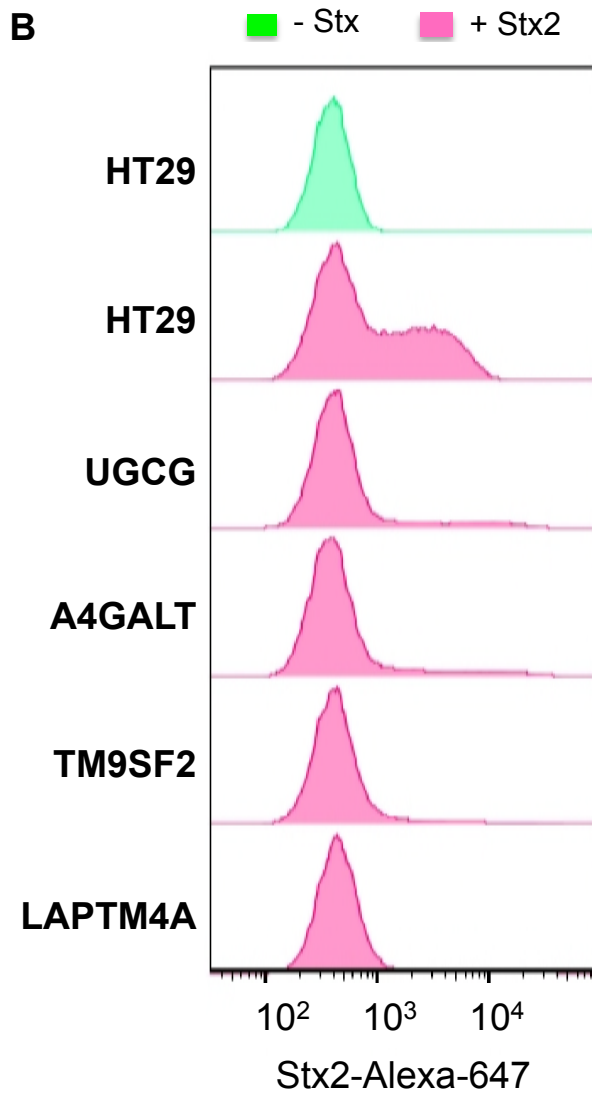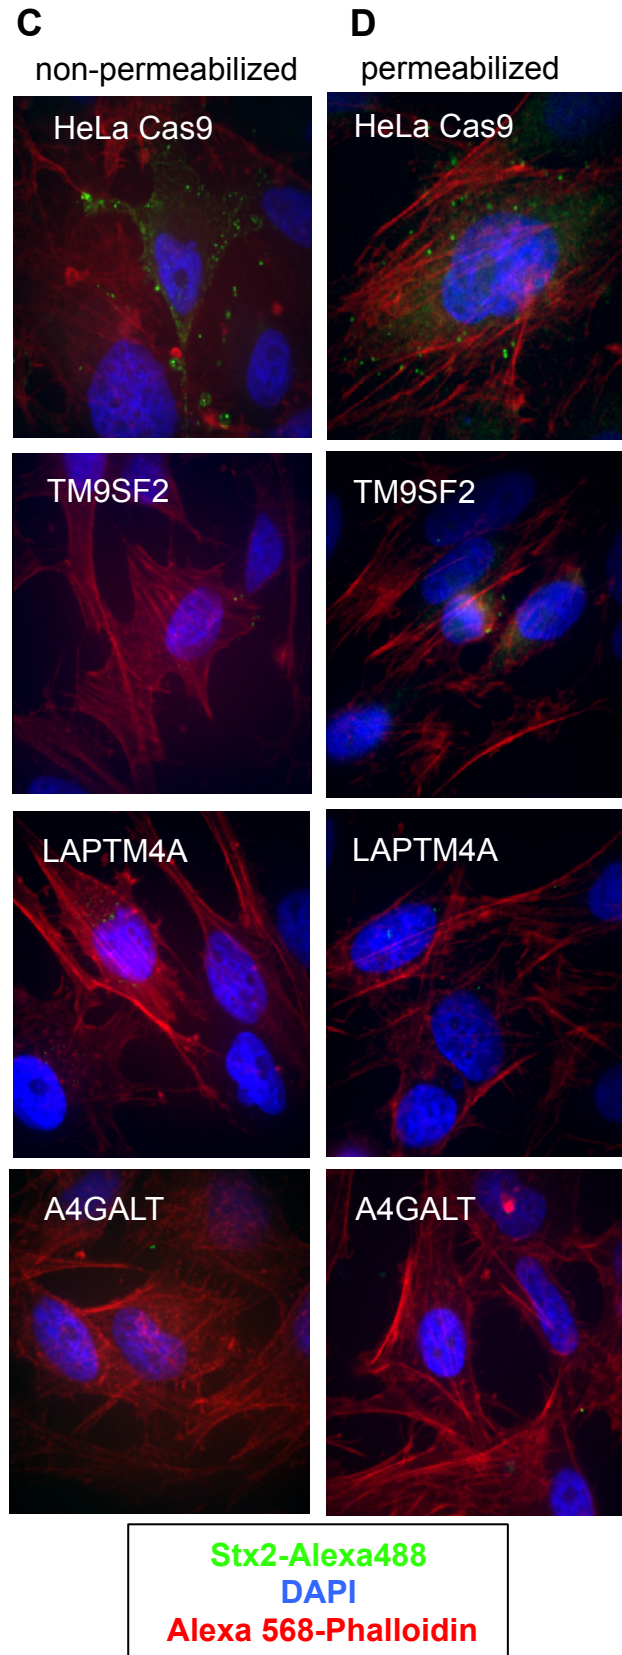



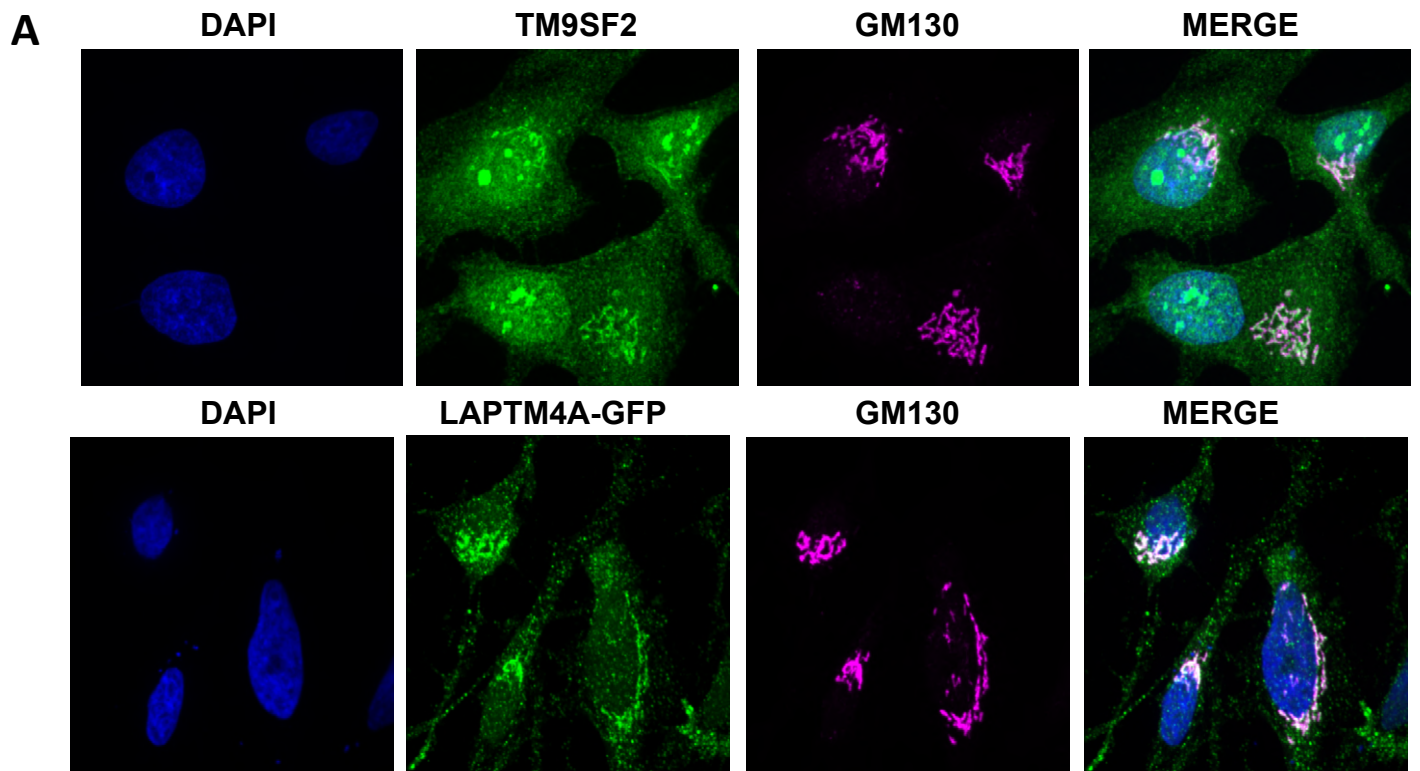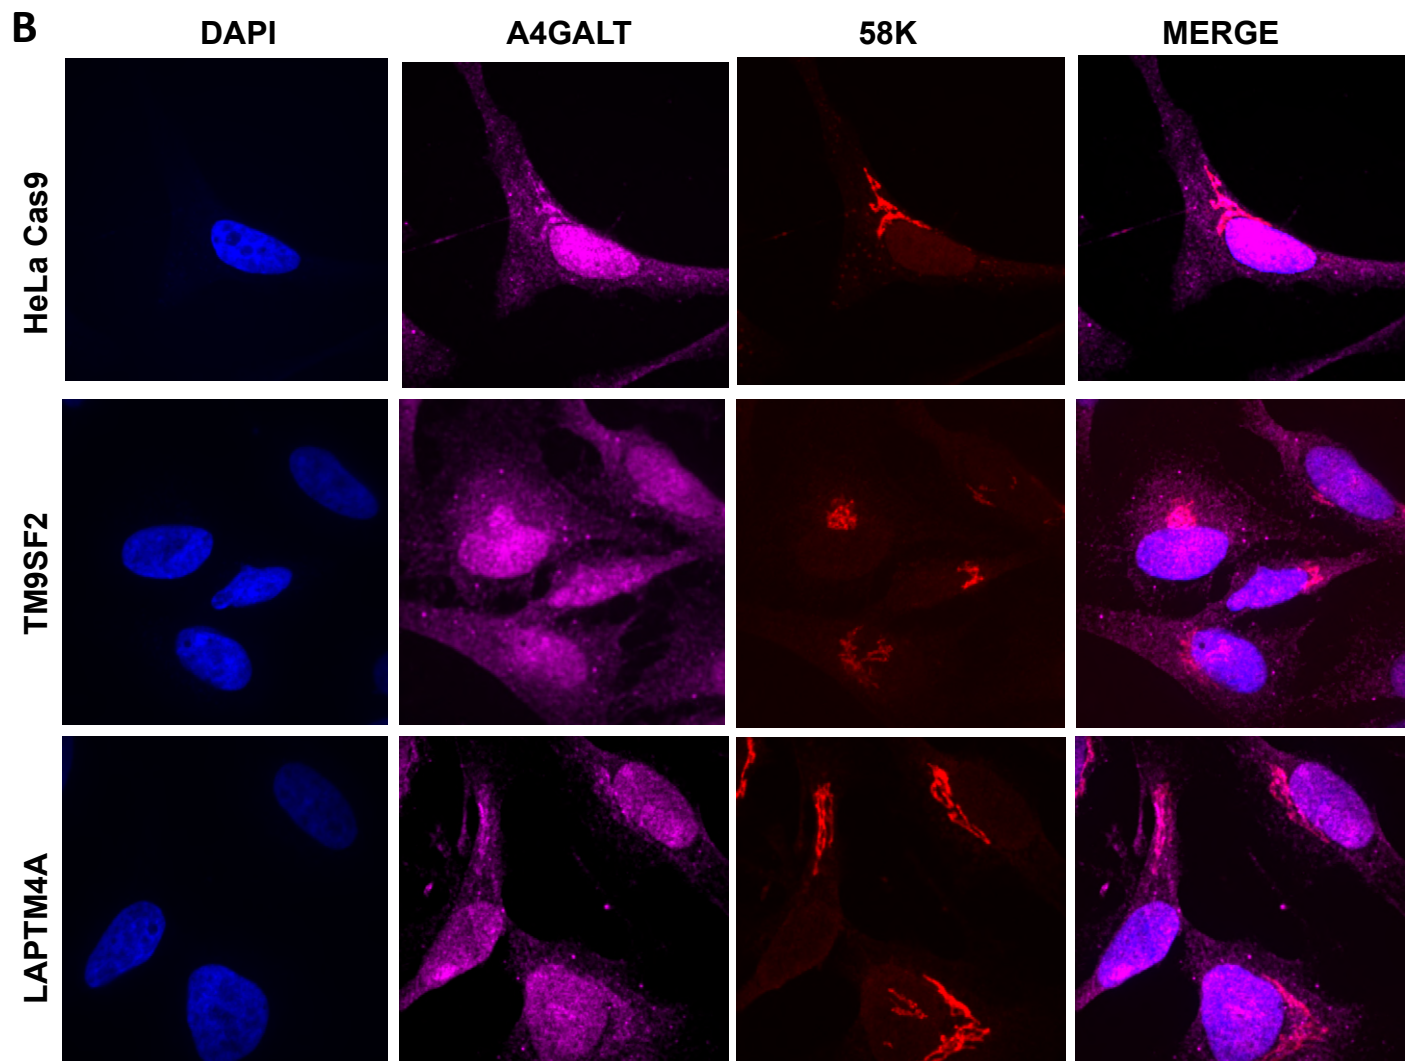

Source: https://www.biorxiv.org/content/10.1101/316919v1.full.pdf
